# Supplementary material for: Benefits and risks of Iron interventions in children (BRISC): protocol for a three-arm parallel-group randomised controlled field trial in Bangladesh
Source: PubMed Central journal article supplement — BMJ Open. 2017 Nov 15;7(11):e018325. doi: 10.1136/bmjopen-2017-018325 (PMC5695407; doi:10.1136/bmjopen-2017-018325), 2017-11-15
Supplement: bmjopen-2017-018325.draft_revisions.pdf [file bmjopen-2017-018325.draft_revisions.pdf]

# BMJ Open

BMJ Open is committed to open peer review. As part of this commitment we make the peer review history of every article we publish publicly available.

When an article is published we post the peer reviewers' comments and the authors' responses online. We also post the versions of the paper that were used during peer review. These are the versions that the peer review comments apply to.

The versions of the paper that follow are the versions that were submitted during the peer review process. They are not the versions of record or the final published versions. They should not be cited or distributed as the published version of this manuscript.

BMJ Open is an open access journal and the full, final, typeset and author-corrected version of record of the manuscript is available on our site with no access controls, subscription charges or pay-per-view fees (<http://bmjopen.bmj.com>).

If you have any questions on BMJ Open's open peer review process please email [editorial.bmjopen@bmj.com](mailto:editorial.bmjopen@bmj.com)

# BMJ Open

## Benefits and Risks of Iron interventions in Children (BRISC): protocol for a three-arm parallel-group randomized controlled field trial in Bangladesh

|                                 |                                                                                                                                                                                                                                                                                                                                                                                                                                                                                                                                                                                                                                                                                                                                                                                                                                                                                                                                                                                                                                                     |
|---------------------------------|-----------------------------------------------------------------------------------------------------------------------------------------------------------------------------------------------------------------------------------------------------------------------------------------------------------------------------------------------------------------------------------------------------------------------------------------------------------------------------------------------------------------------------------------------------------------------------------------------------------------------------------------------------------------------------------------------------------------------------------------------------------------------------------------------------------------------------------------------------------------------------------------------------------------------------------------------------------------------------------------------------------------------------------------------------|
| Journal:                        | <i>BMJ Open</i>                                                                                                                                                                                                                                                                                                                                                                                                                                                                                                                                                                                                                                                                                                                                                                                                                                                                                                                                                                                                                                     |
| Manuscript ID                   | bmjopen-2017-018325                                                                                                                                                                                                                                                                                                                                                                                                                                                                                                                                                                                                                                                                                                                                                                                                                                                                                                                                                                                                                                 |
| Article Type:                   | Protocol                                                                                                                                                                                                                                                                                                                                                                                                                                                                                                                                                                                                                                                                                                                                                                                                                                                                                                                                                                                                                                            |
| Date Submitted by the Author:   | 20-Jun-2017                                                                                                                                                                                                                                                                                                                                                                                                                                                                                                                                                                                                                                                                                                                                                                                                                                                                                                                                                                                                                                         |
| Complete List of Authors:       | Hasan, Mohammed Imrul; International Centre for Diarrhoeal Disease Research<br>Hossain, Sheikh; icddr,b, Maternal and Child Health Division<br>Baat, Sabine ; University of Melbourne School of Population and Global Health, Centre for Epidemiology and Biostatistics<br>Dibley, Michael; The University of Sydney, International Public Health School of Public Health, International Public Health<br>Fisher, Jane; Monash University, Jean Hailes Research Unit, School of Public Health and Preventative Medicine<br>Grantham-McGregor , Sally<br>Tofail, Fahmida; International Centre for Diarrhoeal Disease Research, Centre for Nutrition & Food Security<br>Simpson, Julie; University of Melbourne School of Population and Global Health,<br>Arifeen, Shams E.; ICDDR B, Maternal and Child Health Division (MCHD)<br>Hamadani, Jena; International Centre for Diarrhoeal Disease Research<br>Pasricha, Sant-Rayn; The Royal Melbourne Hospital, Department of Medicine<br>Biggs, Beverley-Ann ; The University of Melbourne, Medicine |
| <b>Primary Subject Heading</b>: | Public health                                                                                                                                                                                                                                                                                                                                                                                                                                                                                                                                                                                                                                                                                                                                                                                                                                                                                                                                                                                                                                       |
| Secondary Subject Heading:      | Neurology, Paediatrics, Nutrition and metabolism, Health economics                                                                                                                                                                                                                                                                                                                                                                                                                                                                                                                                                                                                                                                                                                                                                                                                                                                                                                                                                                                  |
| Keywords:                       | Iron deficiency, cognitive development, Bangladesh, randomized controlled trial, children, Anaemia < HAEMATOLOGY                                                                                                                                                                                                                                                                                                                                                                                                                                                                                                                                                                                                                                                                                                                                                                                                                                                                                                                                    |
|                                 |                                                                                                                                                                                                                                                                                                                                                                                                                                                                                                                                                                                                                                                                                                                                                                                                                                                                                                                                                                                                                                                     |

SCHOLARONE™  
Manuscripts

1  
2  
3 **Benefits and Risks of Iron interventions in Children (BRISC): protocol for a three-arm**  
4 **parallel-group randomized controlled field trial in Bangladesh**  
5  
6  
7

8 **Corresponding authors:**

9 Dr Sant-Rayn Pasricha

10 Department of Medicine, The Royal Melbourne Hospital,  
11 University of Melbourne, Parkville, Australia

12 [Sant-Rayn.Pasricha@unimelb.edu.au](mailto:Sant-Rayn.Pasricha@unimelb.edu.au)

13 +613 8344 3257  
14  
15  
16  
17

18 Prof Beverley-Ann Biggs

19 Department of Medicine, The Royal Melbourne Hospital  
20 Doherty Institute, The University of Melbourne

21 [babiggs@unimelb.edu.au](mailto:babiggs@unimelb.edu.au)

22 +613 8344 3257  
23  
24  
25  
26  
27  
28

29 **Authors**

30 Mohammed Imrul Hasan\*, Maternal and Child Health Division, icddr,b, Dhaka, Bangladesh

31 Sheikh Jamal Hossain,\* Maternal and Child Health Division, icddr,b, Dhaka, Bangladesh

32 Sabine Braat, Centre for Epidemiology and Biostatistics, Melbourne School of Population and

33 Global Health and Melbourne Clinical And Translational Sciences (MCATS), University of  
34 Melbourne, Australia

35 Michael Dibley, School of Public Health, University of Sydney, Sydney Australia,

36 Jane Fisher, School of Public Health and Preventive Medicine, Monash University.

37 Sally Grantham-McGregor, Emeritus Professor, Centre for International Child Health, UCL

38 Fahmida Tofail, Nutrition and Clinical Services Division, icddr,b, Dhaka, Bangladesh

39 Julie A Simpson, Centre for Epidemiology and Biostatistics, Melbourne School of Population

40 and Global Health, and Melbourne Clinical And Translational Sciences (MCATS), University of  
41 Melbourne, Australia

42 Shams El Arifeen, Maternal and Child Health Division, icddr,b, Dhaka, Bangladesh

43 Jena Hamadani,# Maternal and Child Health Division, icddr,b, Dhaka, Bangladesh

44 Sant-Rayn Pasricha,# Department of Medicine, The Royal Melbourne Hospital, Melbourne,  
45 Australia  
46  
47  
48  
49  
50  
51  
52  
53  
54  
55  
56  
57  
58  
59  
60

1  
2  
3 Beverley-Ann Biggs,<sup>#</sup> Department of Medicine, The Royal Melbourne Hospital, Melbourne,  
4  
5 Australia  
6  
7

8 \*Equal contribution; # Equal contribution  
9  
10  
11  
12  
13  
14  
15  
16  
17  
18  
19  
20  
21  
22  
23  
24  
25  
26  
27  
28  
29  
30  
31  
32  
33  
34  
35  
36  
37  
38  
39  
40  
41  
42  
43  
44  
45  
46  
47  
48  
49  
50  
51  
52  
53  
54  
55  
56  
57  
58  
59  
60

For peer review only

**Abstract**

**Introduction:** Anaemia is a major global health problem affecting about 43% of pre-school children globally and 60% of 6-24 months old children in rural Bangladesh, half of which is attributed to iron deficiency (ID). Although the World Health Organization (WHO) recommends universal supplementation with iron or home fortification with iron-containing multiple micronutrient powders (MMPs) to children under 2 years, evidence for benefits of these interventions on childhood development (a key rationale for these interventions) and harms (especially infection) remains limited. This study aims to evaluate the impact of iron or MMPs supplementation compared to placebo on a) children's development b) growth c) morbidity from infections, and d) haematologic and iron indices.

**Methods and analysis:** This study is a three-arm, blinded, double dummy, parallel-group, placebo controlled superiority trial using stratified individual block randomization. The trial will randomise 3300 children aged 8-9 months equally to Arm 1: iron syrup (12.5mg elemental iron), placebo MMPs; Arm 2: MMPs (including 12.5mg elemental iron), placebo syrup; and Arm 3: placebo syrup, placebo MNPs. Children will receive interventions for 3 months based on WHO recommendations and then be followed-up for 9 months post-intervention. The primary outcome is cognitive composite score measured by Bayley-III. Secondary outcomes include motor and language composite score by Bayley-III, behaviour rating using selected items from Wolke's rating scales and BSID-II behaviour ratings, temperament, growth, haemoglobin, anaemia and iron status, and infectious morbidity. Outcomes will be measured at baseline, at the end of 3-month intervention, and after 9 months post-intervention follow-up.

**Ethics and dissemination:** The trial has been approved by the Ethical Review Committee of icddr,b (Dhaka, Bangladesh) and the Melbourne Health Human Research Ethics Committee (Melbourne, Australia). Results of the study will be disseminated through scientific publications, presentations at international meetings, and policy briefs to key stakeholders.

**Trial registration number** ACTRN12617000660381

**WHO Universal Trial Number** U1111-1196-1125

**Keywords** Iron deficiency, anaemia, cognitive development, Bangladesh, randomized controlled trial

**Version 1, June 19<sup>th</sup> 2017**

## Strengths and Limitations

- Trial design: double blind, double dummy design minimizing risk of bias in assessment of outcomes. The trial is designed to be able to compare the main interventions (iron drops and iron-containing micronutrient powders) used for anaemia control in young children against placebo.
- Outcome assessment: The tools we are using, including Bayley Scales, are the gold standard for directly measuring child development.
- Sample size: this is the largest trial to assess effects of iron interventions on child development, and as such the trial is powered to detect small but clinically relevant effect sizes.
- Trial setting: the trial is set in a low income South Asian setting where there is a high baseline prevalence of anaemia, and will exclude children at risk of high groundwater iron exposure.
- Biomarker assessment: measurement of anaemia and iron deficiency, along with growth, at baseline will facilitate subgroup analysis by baseline nutrition status.

## BACKGROUND

### Anaemia is highly prevalent in preschool children

Approximately 43% (up to 304 million) of under-5 children worldwide are anaemic. The number of children affected is greatest in South Asia, where the prevalence exceeds 55%.<sup>1</sup> The relative contribution of iron deficiency (ID) to the overall burden of anaemia varies by region. We have previously found that among rural Indian children aged 12-23 months, ID accounted for 72% of anaemia.<sup>2</sup> In rural Bangladesh, we found about 60% of children 6-24 months to be anaemic, with half of cases due to ID.<sup>3</sup> Conversely, in pre-schoolers in rural Gambia and Tanzania where malaria is endemic, ID accounted for only 20% of anaemia.<sup>4</sup>

### Iron supplementation as a strategy for controlling anaemia in children in low-income settings

Iron supplementation involves administration of medicinal iron (usually ferrous salts).<sup>5</sup> Multiple micronutrient powders (MMPs) comprise single dose sachets of lipoencapsulated iron together with other micronutrients (usually at least vitamin A, zinc and folate) that can be sprinkled onto any semi-solid food, with the aim of providing a child with a recommended daily intake of micronutrients. The World Health Organization (WHO) recommends two different possible direct interventions for controlling anaemia in young children. Firstly, WHO recommends that all children aged 6-23 months, in settings where the prevalence of anaemia exceeds 40%, receive 3 months daily iron supplements.<sup>6</sup> Alternatively, where the prevalence of anaemia exceeds 20%, WHO recommends children 6-23 months receive 90 days home fortification with iron-containing multiple micronutrients powders (MMPs) every six months.<sup>7</sup> WHO does not recommend one approach over the other; their efficacy and safety have not been compared in a large head to head trial; earlier recommendations for MMPs proposed 2 months intervention every six months. Recent estimates indicate that in pre-school children, about 41% and 32% of cases of anaemia in South-East Asia and sub-Saharan Africa respectively, are responsive to iron.<sup>8</sup>

### Adequate iron stores are important for neurological development

The prevalence of anaemia generally increases from 6 months of age and peaks in the second year of life,<sup>9</sup> especially if iron intake from complementary foods is inadequate to meet the demands of erythropoiesis and growth.<sup>10 11</sup> The peak in anaemia prevalence coincides with the critical period for neural development, sharing the same period of peak vulnerability: the 'first 1000 days' from conception to age 2 years.<sup>12</sup> Animal studies also indicate that iron is needed for

1  
2  
3 myelination and neurotransmitter synthesis, while ID alters neuronal metabolism.<sup>13</sup>

4  
5 <sup>14</sup>Observational studies have consistently linked anaemia in infancy to adverse short and longer  
6 term deficits in cognitive development.<sup>15</sup> Hence, animal data and observational studies in  
7 children suggest that ID impairs brain development.<sup>16</sup>  
8  
9

### 11 **Evidence of beneficial effects of iron interventions in children at the population level**

12 While iron interventions improve haemoglobin concentrations and iron indices and reduce the  
13 prevalence of anaemia, ID, and iron deficiency anaemia (IDA),<sup>17-19</sup> there are limited data from  
14 population clinical trials confirming that policies of universal iron interventions improve  
15 development, growth and health in young children.  
16  
17  
18  
19

20  
21 *Effects on development:* Few RCTs have evaluated effects of iron supplements or MMPs on  
22 development in children under 2 years<sup>18 20</sup> and these trials were underpowered individually and  
23 collectively and most of the trials were in pre-selected patient groups (not populations) or were  
24 not blinded (i.e. high risk of bias) limiting the quality of evidence.<sup>18</sup> This paucity of available  
25 evidence has hampered systematic reviews and meta-analyses (RCTs) that have to date failed  
26 to find evidence of benefit from iron interventions (iron supplements, home fortification with  
27 MMPs, or other iron interventions) on development in young children.<sup>21-24</sup> Our systematic review  
28 of daily iron supplementation in children aged 4-23 months identified no significant difference in  
29 Bayley's mental development index (MDI) in children receiving iron compared with control  
30 (mean difference 1.65 [95% confidence interval -0.63, 3.94]); for psychomotor development  
31 index (PDI) the effect size was (mean difference 1.05 [-1.36, 3.46]).<sup>18</sup>  
32  
33

34 Systematic reviews evaluating the effects of MMPs on cognitive development did not identify  
35 RCTs that had reported effects on measures of cognitive development,<sup>25 26</sup> and only reported a  
36 single trial that found children receiving an intervention walked earlier than those from a parallel  
37 control group (i.e. children not included in the study at inception). More recently, a large  
38 randomized trial in Pakistan identified only transient benefits from MMPs on Bayley's cognitive,  
39 language and psychomotor development,<sup>27</sup> and motor development in the longer term.<sup>28</sup> This  
40 trial did not use placebo and was hence not adequately blinded; moreover, adherence to the  
41 supplements appeared limited and had no effect on haemoglobin concentration compared to  
42 control children.<sup>27</sup>  
43  
44  
45  
46  
47  
48  
49  
50  
51  
52

53  
54  
55 *Effects on growth:* Benefits on growth are often cited as a rationale for universal iron  
56 supplementation.<sup>29</sup> However previous systematic reviews have not found benefits on growth,  
57  
58  
59  
60



1  
2  
3 and indeed, have found that iron interventions can impair linear growth in iron-replete children.<sup>30</sup>  
4  
5 Our systematic review suggested daily iron supplementation reduced length and weight gain in  
6  
7 young children.<sup>18</sup> A systematic review of iron-containing MMPs found no increase in growth  
8  
9 despite containing the growth-promoting micronutrient zinc.<sup>20</sup>  
10

### 11 **Evidence of harm from iron supplementation**

12  
13 In contrast to the lack of data on benefits, several large RCTs have reported adverse effects  
14  
15 from iron interventions in low-income settings. This emerging data along with mechanistic  
16  
17 studies in low-income settings are now providing convincing evidence that these interventions  
18  
19 cause or exacerbate infection, including diarrhea, bloody diarrhea, and respiratory infections in  
20  
21 endemic and non-endemic malaria settings.<sup>27 31-33</sup> For example, our meta-analysis of iron  
22  
23 supplementation identified a 16% and 38% increased risk of fever and vomiting respectively.<sup>18</sup>  
24

### 25 **The need for a trial**

26  
27 Although immediate and long-term benefits from iron on functional outcomes such as cognitive  
28  
29 development and growth have been assumed for decades, existing data from RCTs do not  
30  
31 support this contention. In contrast, data for evidence of harm from iron interventions is  
32  
33 accumulating. Furthermore, iron supplements have not been compared directly to MMPs in a  
34  
35 large field trial. In this RCT, we aim to define the benefits and harms of daily iron  
36  
37 supplementation and MMPs in young children, enabling evidence-based recommendations for  
38  
39 implementation (or withdrawal) of iron interventions in this age group.  
40  
41  
42  
43  
44  
45  
46  
47  
48  
49  
50  
51  
52  
53  
54  
55  
56  
57  
58  
59  
60

## METHODS AND ANALYSIS

### *Benefits and risks of iron interventions in children (BRISC)*

#### **Trial objectives**

The primary objective of this study is to determine if 3 months interventions with iron supplementation or home fortification with MMPs is superior to placebo on cognitive development in children aged 8 months.

The secondary objectives are to evaluate the impact of iron supplementation and home fortification with MMPs, compared with placebo, on:

- Developmental indices, i.e. cognitive (after 9 months post-intervention), and motor, language, behaviour and temperament (after 3 months intervention and 9 months post-intervention),
- Prevalence of anaemia and iron deficiency (after 3 months intervention and 9 months post-intervention), and
- Infection risks, especially diarrhoea and respiratory infection in these young children (after 3 months intervention and 9 months post-intervention).

#### **Study design**

BRISC is a three-arm; parallel; researcher, caregiver, data collector, analysts, and participant-blinded-blind; individually randomised; double-dummy placebo controlled; superiority trial. It will compare the effects of 3 months of daily i) iron supplementation, or ii) MMPs, to iii) placebo in 8 months old Bangladeshi children, with a further 9 months follow up. The trial design is summarized in Figure 1.

#### **Study settings and participants**

The trial will be conducted in Rugganj, a rural sub-district/upazila of Narayanganj district about 50km from Dhaka, in Bangladesh. Three unions (regions) within the sub-district will be included, with each union covered by a dedicated study team. A recent national survey reported the prevalence of anaemia in 9-11 months old infants at 78.7%.<sup>34</sup> Diarrhoea and respiratory infections remain highly endemic in Bangladesh, with 4.6% and 5.8% of children <5 years experiencing these respectively in a 2-week period. The site is non malaria-endemic and drinking water consumed by the families does not contain high iron in most instances.<sup>35 36</sup> The trial will have global generalizability, especially to South Asia where the prevalence of anaemia in this age group approaches 90%.<sup>12</sup>

## Eligibility Criteria

Children will be randomised only if they fulfill all the inclusion criteria and none of the exclusion criteria.

Inclusion criteria:

1. Aged 8 months ( $\pm 14$  days) at the time of randomization,
2. Not expected to leave the study location for more than one week over the next 3 months, or for more than one month over the next 12 months,
3. Has a legal guardian capable of providing informed consent.

Exclusion criteria:

Children meeting any of the following criteria will be excluded from the study:

1. Capillary haemoglobin (Hb)  $< 8.0$ g/dL at the time of screening.
2. Drinking water iron concentration  $> 1$ mg/L.
3. Diagnosed case of any clinical haemoglobinopathy (e.g. beta-thalassaemia major, HbE-beta thalassaemia).
4. Current infective illness (i.e. respiratory infection, diarrhoea) with fever; however, children may be rescreened again after recovery if otherwise eligible.
5. Received iron supplements or iron-containing MMP in the previous month.
6. Known congenital anomaly, developmental disorder or severe developmental delay.
7. Child of multiple birth e.g. twins, triplets.

## Intervention

Participants will be randomised in a 1:1:1 ratio to each of the three arms. Infants in the two active intervention arms will receive 12.5 mg daily oral iron either in syrup form or as MMPs as recommended by WHO.<sup>37 38</sup> Each participant will receive both a syrup (to be dispensed via a syringe at a predefined volume) and a sachet (to be sprinkled on food), achieving double dummy blinding. Iron syrup and the corresponding placebo will be manufactured in Bangladesh by ACME Laboratories. Micronutrient powders and corresponding placebo will be manufactured by Renata Ltd. Mothers/caregivers will be instructed (with demonstrations) how to administer the supplements. Participants will be asked to take one dose of each formulation daily for 3 months.

Intervention arms:

1  
2  
3 *Arm 1: (Iron syrup and placebo sachet):* Daily oral supplementation of 12.5 mg elemental iron  
4 syrup and a placebo sachet containing powders in identical packaging to the MMP, but  
5 containing no micronutrients.  
6  
7

8 *Arm 2 (MMP sachet and placebo syrup):* Daily home-fortification with an MMP sachet containing  
9 12.5 mg Iron, 0.3 mg Vitamin A, 30 mg Vitamin C, 0.16 mg Folic Acid, and 5 mg Zinc; placebo  
10 syrup containing no iron but identical in colour and flavour.  
11  
12

13 *Arm 3: (Placebo syrup and placebo sachet):* Control arm.  
14

15 Each participant will receive a pouch every week containing a bottle of syrup and 7 sachets.  
16  
17

### 18 **Randomisation**

19 Participants will be randomly allocated to one of the three arms with 1:1:1 allocation using a  
20 computer-generated schedule of randomly permuted blocks of fixed size stratified by sex and  
21 union (each covered by a different field team) to achieve balance between the arms within each  
22 stratum. The randomisation list will be prepared by an independent statistician, who will not  
23 reveal the block size. The allocation will occur by the field team according to the list, within their  
24 assigned union, once eligibility criteria have been checked.  
25  
26  
27  
28  
29  
30

### 31 **Allocation concealment and blinding of study agents**

32 Blinding of the team visiting the site, the caregiver(s), and participants will be achieved through  
33 the use of identical packaging of sachets and syrup regardless of their contents (active or  
34 placebo), packaged in pouches that carry an allocation code. The independent statistician will  
35 hold the allocation codes until the data base is ready for unblinding. Researchers, caregivers,  
36 persons involved with data collection (i.e. field team) or analysis will be blinded to the allocation  
37 code until the database has been finalized for analysis. Breaking of the allocation code will  
38 occur only in the case of a severe adverse event or as requested by Data Safety Monitoring  
39 Board (DSMB), in which case the code will only be disclosed to the local study physician.  
40  
41  
42  
43  
44  
45  
46  
47  
48  
49  
50  
51  
52  
53  
54  
55  
56  
57  
58  
59  
60

### 50 **Recruitment and visits**

51 The schedule of visits is outline in Table 1. Trained Village Health Workers (VHWs) will identify  
52 all potentially eligible children by making household visits in their designated areas and collating  
53 these data centrally, enabling generation of a list of age-specific eligible participants in each  
54 village. Based on the list, VHWs and Senior Field Assistants (SFAs) will visit potentially eligible  
55 families. After providing preliminary information to the parents/guardians, the team will obtain  
56  
57  
58  
59  
60

their consent for screening and determine their eligibility. During screening, drinking water iron level will be measured using “HACH” Iron (Ferrous) test Kit and the child’s capillary Hb level will be measured by *HemoCue*-301. Children with Hb<8.0 gm/dl will be excluded and referred to nearby health centre for management. Mothers/guardians of eligible children will be briefed further about the trial, and be invited to a selected house/test centre for enrollment.

Enrolled families will attend a designated local study site on a proscribed day for enrolment and baseline data collection. The data collection team consisting of a psychological tester, a SFA, a phlebotomist and a VHW will undertake detailed data collection. At this visit, consent for participation in the study will be signed and we will collect baseline information, administer developmental tests and interviews, take anthropometric measurements and finally, a study phlebotomist will collect 3 mL of venous blood. The child will then receive the randomly allocated intervention. Testers will provide detailed instruction regarding medication to mothers or caregivers before they leave the test centre and they will give details of the enrolled child to the assigned VHW for prospective follow-up visits. The assigned VHW will then visit the child every week for the 3 month intervention period, and every month for the 9 month post intervention period. Morbidity data will be collected weekly and monthly during the intervention and post intervention period respectively. VHWs will also record and notify any unscheduled hospital or clinic admission experienced by the participant. The number of doses missed by participants will be recorded, empty bottles and sachets will be collected and new doses for the following week dispensed at routine weekly visits.

**Table 1: Overview of study visits**

| ACTIVITIES | STUDY PERIOD    |                        |                                                                           |                                      |                                                                                        |                                                    |
|------------|-----------------|------------------------|---------------------------------------------------------------------------|--------------------------------------|----------------------------------------------------------------------------------------|----------------------------------------------------|
|            | Screening       | Baseline/<br>enrolment | Post-allocation                                                           |                                      | Close-<br>out                                                                          |                                                    |
| Time point | -t <sub>1</sub> | Day 0<br>Visit 1       | Weekly visits<br>Day<br>7,14,21,28,35,<br>42,49,56,63,70,77<br>Visit 2-12 | Midline<br>3rd+<br>month<br>Visit 13 | Monthly visits<br>(post-<br>intervention)<br>Month<br>4,5,6,7,8,9,10,11<br>Visit 14-20 | Endline<br>12 <sup>th</sup><br>+months<br>Visit 21 |

|                                       |                      |   |   |   |   |   |
|---------------------------------------|----------------------|---|---|---|---|---|
| Enrolment:                            | Age approx. 8±0.5 mo |   |   |   |   |   |
| Eligibility screen                    | X                    |   |   |   |   |   |
| Informed consent                      | X                    | X |   |   |   |   |
| Allocation                            |                      | X |   |   |   |   |
| Interventions:                        |                      | X | X |   |   |   |
| Socio demographic information         |                      | X |   |   |   |   |
| Family Care Indicators                |                      | X |   | X |   | X |
| Temperament questionnaire             |                      | X |   | X |   | X |
| Food security questionnaire           |                      | X |   | X |   | X |
| Adherence and morbidity questionnaire |                      |   | X | X | X | X |
| Bayley-III                            |                      | X |   | X |   | X |
| Wolke's Behaviour Rating Scale        |                      | X |   | X |   | X |
| Anthropometry                         |                      | X |   | X |   | X |
| Adverse events reporting (AE,SAEs)    |                      |   | X | X | X |   |
| Corneal lesions assessment            |                      |   |   | X |   |   |
| Venous blood collection               |                      | X |   | X |   | X |
| Willingness to                        |                      |   |   | X |   |   |

|                      |  |  |  |  |  |  |
|----------------------|--|--|--|--|--|--|
| pay<br>questionnaire |  |  |  |  |  |  |
|----------------------|--|--|--|--|--|--|

## Other visits

### Withdrawal visit

Children who stop study drug may continue with assessments if their guardian wishes. If a participant withdraws early or investigator terminates participation, we will seek to undertake the following assessments:

- Reason for study withdrawal
- If within 2 weeks of visit 13 or 21, we will invite the participant to attend to undertake this visit unless the reason for withdrawal precludes this.

Recruitment is expected to commence in July 2017 and the trial will be open for 18 months. Expected participant flow is shown in Figure 2.

## Study oversight and adherence

All staff will undergo specific training unique to their role in the study. Adherence will be monitored for all participants. VHWs will measure the amount of syrup and number of sachets unused, and it will be recorded on the case record forms of each child.

## Outcomes

### *Primary outcome*

Cognitive Composite Score (CogCS) measured by Bayley Scales of Infant and Toddler Development (Bayley-III) after 3 months of intervention is the primary outcome.<sup>39</sup> Bayley-III is a validated index of child development and the preferred field assessment tool. It is a standard series of measurements primarily to assess cognitive, motor (fine and gross) and language (receptive and expressive) development of infants and toddlers aged 0-3 ½ yrs. Total number of credited items is converted into scaled scores based on child's age, which are then converted to composite scores of each subscale. These scores are used to determine the child's performance compared with norms taken from typically developing children of their age in developed countries. Bayley-II has been adapted and extensively used on Bangladeshi children.<sup>40-42</sup> Bayley-III has now been adapted, with some components not familiar for the rural and urban children of this country changed according to the local context. It has been used in

1  
2  
3 several studies in this population.<sup>43</sup> Bayley testers will be certified and permitted to collect data  
4 only when their results agree >90% with the gold standard i.e. the trainer. About 5-10% of the  
5 tests by each tester will be observed by the trainer for inter-tester reliability over the course of  
6 the study.  
7  
8  
9

### 10 11 *Secondary outcomes*

12  
13 *Development:* CogCS at the end of 9 months post intervention, motor and language composite  
14 scores by Bayley-III, behaviour rating on selected items from Wolke's rating scales and BSID-II  
15 behaviour ratings, temperament by using a modified version of Bates, quality of home  
16 stimulation by using family care indicators, and food insecurity by household food insecurity  
17 access scale will be measured immediately after intervention and post intervention follow-up.<sup>44-</sup>  
18  
19  
20

21 <sup>47</sup>

22  
23  
24 *Physical growth:* will be measured as length, weight, head circumference at end of intervention  
25 and post follow-up period. Length of the child will be measured to the nearest 0.1 cm by using  
26 the Shorr stadiometer (Shorr Products), which has been previously validated and used on local  
27 population. Weights will be obtained using a battery-powered digital scale (Tanita HD-318).  
28 Length and weight will be used to develop indicators of stunting and wasting compared to age-  
29 sex specific WHO international reference growth standards.<sup>48</sup> Measurements will be taken in  
30 duplicate with the average taken unless substantial discrepancy occurs. Presence of corneal  
31 lesions (caused by vitamin A deficiency) will be assessed by the field team at the midline visit.  
32  
33  
34  
35  
36  
37  
38

39 *Infectious morbidity:* as rate and number of days affected by diarrhea/ bloody diarrhea (along  
40 with number of episodes per day), respiratory infection, vomiting, and fever during intervention  
41 and post intervention follow up period. Morbidity information will be collected by VHWs during  
42 routine weekly or monthly visits by interviewing caregivers.  
43  
44  
45  
46

47 *Unplanned hospital or health-care facility attendance:* as rate, will be measured by field workers  
48 along with morbidity questionnaires. Cause specific attendance will also be ascertained by  
49 checking health care records by study physician.  
50  
51  
52

53 *Adherence to study medication:* measured by field workers' audit of packs or measuring the  
54 unused doses during weekly visits.  
55  
56  
57  
58  
59  
60



1  
2  
3 *Economic data:* Data for future health economic analyses will be collected along with unplanned  
4 clinic presentation and hospital admission. Willingness to pay (WTP) will be measured through  
5 contingent valuation method to predict the maximum price at or below which the participants will  
6 definitely buy one unit of the medicine at the end of intervention.  
7  
8  
9

10  
11 *Blood samples:* 3mL of venous blood will be collected. Anaemia (Hb<11gm/dL), Iron Deficiency  
12 (Ferritin<12ng/uL) and Iron Deficiency Anaemia (Anaemia + Iron Deficiency) will be measured  
13 at baseline, at the end of intervention and at post intervention follow-up periods. Hemoglobin will  
14 be assessed by HemoCue 301 and Ferritin will be assessed by cobas c 311 analyzer. Surplus  
15 serum and whole blood will be stored for related subsequent studies.  
16  
17  
18  
19

### 20 21 **Sample size and power estimation**

22 The sample size calculation is based on the primary objective which will be evaluated using the  
23 estimated mean difference and 95% confidence interval (CI) in the change from baseline to 3  
24 months post-baseline of the Bayley III CogCS between the iron supplementation and placebo  
25 arm, and the MMPs and placebo arm. By construct, the Bayley III CogCS ranges between 55  
26 and 150 (standardised mean 100; standard deviation [SD] 15) whereby a higher Bayley III  
27 CogCS indicates a better cognitive performance. Our systematic review estimated a difference  
28 of 1.65 points (n=1093 across six trials; random-effects 95% CI [-0.63, 3.94]) on Bayley Mental  
29 Development Index (MDI) (the cognitive scale reported on previous versions of the Bayley  
30 scales) in favor of daily iron supplementation compared to control in children aged 4-23 months.  
31 Among the six studies included in this systematic review, the highest quality (Cochrane risk of  
32 bias tool) study (in Indonesia) evaluating effects on development in a community setting found a  
33 2-point difference of universal iron supplementation (n=136) compared to placebo (n=143) after  
34 6 months' intervention (mean Bayley MDI: iron 101 versus placebo 99, p=0.76).<sup>49</sup> A more recent  
35 (but non-blinded) trial in Pakistan found a significant 2.5-point difference of MMPs (n=658)  
36 compared to control (n=699) at 12 months of age (mean Bayley III CogCS: MMPs 95.9 versus  
37 placebo 93.4, p=0.007).<sup>27</sup> The sample size required to detect a 2-point difference is 883 per arm  
38 to reach 80% power using a two-sided 2.5% level of significance for each comparison  
39 (Bonferroni correction), assuming a 15-point SD. Accounting for about 20% missing data in  
40 Bayley III CogCS at 3 months post-baseline, based on a randomised trial in Bangladesh which  
41 reported a 26% loss between birth and 6 months<sup>41</sup>, the total sample size is 3300. This is  
42 currently the largest trial evaluating effects of iron compared to placebo on cognitive  
43 development ever to be conducted and will provide evidence for the overall, average effect of  
44  
45  
46  
47  
48  
49  
50  
51  
52  
53  
54  
55  
56  
57  
58  
59  
60

1  
2  
3 these interventions when applied universally to a population with a high prevalence of anaemia,  
4 as presently recommended by the World Health Organization.  
5  
6  
7

### 8 **Statistical analysis plan**

9  
10 All randomised infants will be included in the analysis set according to the arm to which the  
11 infant was randomly allocated. Baseline characteristics will be examined across the arms to  
12 assess the randomization. Continuous data will be summarized using mean and SD or median  
13 and 25<sup>th</sup>-75<sup>th</sup> percentile if data are found to be skewed (e.g., ferritin). Categorical data will be  
14 presented as count and percentage. The primary outcome, Bayley-III CogCS scores at  
15 baseline, 3 month, and 12 month post-baseline, will be analysed using a constrained  
16 longitudinal data analysis method.<sup>51</sup> The model will incorporate time point as a categorical  
17 variable and assume a common baseline mean across the three arms. Furthermore, it will  
18 adjust for the stratification factors used in the randomisation (gender, union) as main factors and  
19 model the variance-covariance among the repeated measurements as unstructured. The  
20 estimate and 95% CI of the mean difference in change from baseline to each post-baseline time  
21 point between two arms will be obtained from this model. This model will yield unbiased results  
22 when the outcome data are missing at random. In addition, sensitivity analyses consisting of an  
23 adjusted analysis accounting for key prognostic baseline variables (e.g., socio-economic status)  
24 will be conducted. Secondary continuous outcomes (e.g., Bayley III domain scores,  
25 anthropometry, z-scores [growth], behavior rating scale) will be analysed similarly as the  
26 primary outcome. Appropriate transformations may be applied to the variables before fitting the  
27 model if considered skewed. Secondary binary outcomes (e.g., growth stunting, wasting, and  
28 underweight) will be analysed using generalized estimating equations with a logarithmic link  
29 function and unstructured correlation. A Poisson regression, or in case of over-dispersion  
30 negative binomial regression, will be used to analyse the rate of infections (e.g., fever) for the  
31 duration of the intervention period, the follow-up period, and 12-month study period. The  
32 number and percentage of infants with at least one infection, at least one AE, and at least one  
33 unplanned hospital or health-care facility attendance will be tabulated by arm for the duration of  
34 the intervention period, the follow-up period, and 12-month study period. A per-protocol  
35 analysis of efficacy outcomes, based on adherence, and as as-treated analysis of safety  
36 outcomes, in case of misrandomisation, will also be conducted. Exploratory subgroup analyses  
37 will be performed irrespective of the primary study findings by a) baseline anemia status (yes vs  
38 no anemia), b) baseline iron deficiency status (yes vs no iron deficient), c) baseline iron  
39 deficiency anemia status (yes vs no iron deficient anemia) d) baseline home stimulation (above  
40  
41  
42  
43  
44  
45  
46  
47  
48  
49  
50  
51  
52  
53  
54  
55  
56  
57  
58  
59  
60

1  
2  
3 vs below median level as measured by family care indicators) e) wealth status (above or below  
4 median), f) growth (presence or absence of stunting), and g) infant's sex (male vs female) by  
5 adding subgroup as a main effect and its interaction with treatment arm to the model to evaluate  
6 if the treatment effect differs across subgroup categories. We postulate that infants with anemia,  
7 iron deficiency, iron deficiency anemia, or above median home stimulation will have a larger  
8 treatment effect compared to those whom are non-anaemic, non-iron deficient, non-iron  
9 deficient anaemic, or below median home stimulation respectively.  
10  
11  
12  
13  
14  
15

16 In addition, depending on the findings of the study, we will undertake subsequent health  
17 economics analysis of the data. For this purpose, we will collect and present all direct and  
18 indirect costs for the implementation of the project. The contingent valuation methods will be  
19 used to estimate weekly WTP and multiple regression analysis will be used to predict WTP by  
20 socioeconomic characters, past illness and type of medicine.  
21  
22  
23  
24  
25

### 26 **Data management**

27 Data from questionnaires will be entered directly into electronic tablets in the field, along with  
28 GPS location data. Data will be checked in real time for quality by a dedicated data manager.  
29 Data for Bayley scales will be entered subsequently, with 10% undergoing double entry. Range  
30 checks will be applied automatically to all data. All aspects of the trial conduct (field work eg  
31 ethical recruitment and consent, randomisation, provision of interventions, outcome  
32 assessments, data collection and entry) will be audited at least annually by investigators from  
33 the University of Melbourne.  
34  
35  
36  
37  
38  
39

### 40 **ETHICS AND DISSEMINATION:**

41 The trial has been approved by the Melbourne Health Human Research Ethics Committee,  
42 Australia (2016.269); the Ethical Review Committee of icddr,b (PR-16063); and the Directorate  
43 General of Drug Administration, Ministry of Health and Family Welfare, Bangladesh. Informed  
44 written consent will be obtained from parents/guardians prior to both screening and enrollment  
45 procedures – either via signature or a thumbprint or mark for those who cannot sign. Written  
46 informed consent from the child's parent or legal guardian will be obtained by the SFA, the most  
47 senior member of the field data collection teams. Consent will encompass participation in the  
48 trial and its procedures, as well as storage and possible use of samples for related studies in the  
49 future; this includes non-diagnostic molecular and genetic studies. Children ineligible at  
50 recruitment due to illness will be referred for clinical care. Any information obtained in  
51  
52  
53  
54  
55  
56  
57  
58  
59  
60

1  
2  
3 connection with this research project or in any publication and/or presentation, will be provided  
4 in such a way that the individual cannot be identified. Only researchers on this project will have  
5 access to the data. Three years after the protocol completion date icddr,b research data in the  
6 repository will be made publicly available according to icddr,b data access policy.  
7  
8  
9  
10

### 11 **Data Monitoring**

12 An independent Data Safety Monitoring Board (DSMB) has been constituted and will provide  
13 oversight of the study. In cases of serious adverse events, the study physician will follow-up and  
14 document the course of events, will recommend for necessary suspension, refer if necessary  
15 and report to DSMB. As per best practice, the DSMB will define their meeting schedule and plan  
16 for interim analyses and define stopping rules in the DSMB charter. Amendments to the trial  
17 protocol will be updated in the trial protocol, the trial registration, informed by memo to all  
18 investigators as well as the ethical review committees, and if significant, will be explained in the  
19 final publications of the trial.  
20  
21  
22  
23  
24  
25  
26  
27  
28  
29  
30  
31  
32  
33  
34  
35  
36  
37  
38  
39  
40  
41  
42  
43  
44  
45  
46  
47  
48  
49  
50  
51  
52  
53  
54  
55  
56  
57  
58  
59  
60

## Discussion

Understanding the benefits and risks of universal iron interventions in young children at the population level is a public health priority. This pivotal trial will form the platform for global anaemia control policy in young children. It will define global guidelines, inform policymakers at the national and regional level, and provide the economic rationale for donors and governments to select and fund anaemia control interventions. The design (combining interventions with vaccination) will enable translation to the field. Results will be communicated to the academic community through publication in peer-reviewed journals. Criteria for authorship will reflect ICMJE guidelines. We will also communicate results to policy makers through policy-briefs and reports e.g. WHO, UNICEF, and major nutrition bodies (e.g. GAIN).

**Author contributions:** SP and BB conceived of the idea for the trial. SP, BB, MD, JF, SGM, JS, SA, JH prepared the initial funding submissions and proposals. MIH, SJH, SB, JH, SP and BB prepared the detailed trial protocol. SB and JAS developed the statistical analysis plan. MOH, SJH, FT and JH designed the field work. MIH, SJH and SP wrote the first draft of the manuscript, and all authors have reviewed and authorized it.

**Funding statement:** The BRISC trial is being implemented by icddr,b in collaboration with University of Melbourne and funded by NHMRC, grant number 1103262. SP is funded by a CJ Martin NHMRC Fellowship. The trial is investigator initiated and sponsored, the trial sponsor will be the University of Melbourne.

**Competing interest statement:** The investigators have no financial or other conflicts of interest to declare.

**Provenance and peer review:** Not commissioned, externally peer reviewed.

**References:**

1. Stevens GA, Finucane MM, De-Regil LM, et al. Global, regional, and national trends in haemoglobin concentration and prevalence of total and severe anaemia in children and pregnant and non-pregnant women for 1995-2011: a systematic analysis of population-representative data. *Lancet Glob Health* 2013;1(1):e16-e25.
2. Pasricha SR, Black J, Muthayya S, et al. Determinants of anemia among young children in rural India. *Pediatrics* 2010;126(1):e140-9. doi: 10.1542/peds.2009-3108 [published Online First: 2010/06/16]
3. Tofail F. Prevalence of iron deficiency anaemia among young children in rural Bangladesh. *Health and Science Bulletin* 2010;8(2):1-6.
4. Pasricha SR, Atkinson SH, Armitage AE, et al. Expression of the iron hormone hepcidin distinguishes different types of anemia in African children. *Science translational medicine* 2014;6(235):235re3. doi: 10.1126/scitranslmed.3008249
5. Pasricha SR, Flecknoe-Brown SC, Allen KJ, et al. Diagnosis and management of iron deficiency anaemia: a clinical update. *Med J Aust* 2010;193(9):525-32. [published Online First: 2010/11/03]
6. WHO. Daily iron supplementation in children 6-23 months of age Geneva: World Health Organization; 2016 [Available from: [http://www.who.int/elena/titles/guidance\\_summaries/iron\\_children/en/](http://www.who.int/elena/titles/guidance_summaries/iron_children/en/) accessed July 11th 2016.
7. WHO. WHO guideline: Use of multiple micronutrient powders for point-of-use fortification of foods consumed by infants and young children aged 6–23 months and children aged 2–12 years. Geneva: World Health Organization, 2016.
8. World Health Organization. The global prevalence of anaemia in 2011. Geneva: World Health Organization 2015.
9. Black RE, Allen LH, Bhutta ZA, et al. Maternal and child undernutrition: global and regional exposures and health consequences. *Lancet* 2008;371(9608):243-60. doi: S0140-6736(07)61690-0 [pii]
- 10.1016/S0140-6736(07)61690-0 [published Online First: 2008/01/22]
10. Pasricha SR. Anemia: a comprehensive global estimate. *Blood* 2014;123(5):611-2. doi: 10.1182/blood-2013-12-543405
11. Pasricha SR, Drakesmith H, Black J, et al. Control of iron deficiency anemia in low and middle-income countries. *Blood* 2013 doi: 10.1182/blood-2012-09-453522 [published Online First: 2013/01/29]
12. Kassebaum NJ, Jasrasaria R, Naghavi M, et al. A systematic analysis of global anemia burden from 1990 to 2010. *Blood* 2013 doi: 10.1182/blood-2013-06-508325
13. Beard J. Recent evidence from human and animal studies regarding iron status and infant development. *The Journal of nutrition* 2007;137(2):524S-30S. doi: 137/2/524S [pii] [published Online First: 2007/01/24]
14. Beard JL. Why iron deficiency is important in infant development. *J Nutr* 2008;138(12):2534-6. [published Online First: 2008/11/22]
15. McCann JC, Ames BN. An overview of evidence for a causal relation between iron deficiency during development and deficits in cognitive or behavioral function. *Am J Clin Nutr* 2007;85(4):931-45. [published Online First: 2007/04/07]
16. Walker SP, Wachs TD, Gardner JM, et al. Child development: risk factors for adverse outcomes in developing countries. *Lancet* 2007;369(9556):145-57. doi: 10.1016/S0140-6736(07)60076-2 [published Online First: 2007/01/16]
17. Low M, Farrell A, Biggs BA, et al. Effects of daily iron supplementation in primary-school-aged children: systematic review and meta-analysis of randomized controlled trials. *CMAJ* 2013 doi: 10.1503/cmaj.130628



18. Pasricha S-R, Hayes E, Kalumba K, et al. Effect of daily iron supplementation on health in children aged 4–23 months: a systematic review and meta-analysis of randomised controlled trials. *Lancet Glob Health* 2013;1(2):e77 - e86.
19. Thompson J, Biggs BA, Pasricha SR. Effects of Daily Iron Supplementation in 2- to 5-Year-Old Children: Systematic Review and Meta-analysis. *Pediatrics* 2013 doi: 10.1542/peds.2012-2256 [published Online First: 2013/03/13]
20. De-Regil LM, Suchdev PS, Vist GE, et al. Home fortification of foods with multiple micronutrient powders for health and nutrition in children under two years of age. *Cochrane Database Syst Rev* 2011;9:CD008959.
21. Sachdev H, Gera T, Nestel P. Effect of iron supplementation on mental and motor development in children: systematic review of randomised controlled trials. *Public Health Nutr* 2005;8(2):117-32.
22. Szajewska H, Rusczyński M, Chmielewska A. Effects of iron supplementation in nonanemic pregnant women, infants, and young children on the mental performance and psychomotor development of children: a systematic review of randomized controlled trials. *Am J Clin Nutr* 2010;91(6):1684-90. doi: ajcn.2010.29191 [pii] 10.3945/ajcn.2010.29191 [published Online First: 2010/04/23]
23. Wang B, Zhan S, Gong T, et al. Iron therapy for improving psychomotor development and cognitive function in children under the age of three with iron deficiency anaemia. *Cochrane Database Syst Rev* 2013;6:CD001444. doi: 10.1002/14651858.CD001444.pub2
24. Horton S, Ross J. The economics of iron deficiency. *Food Policy* 2003;28:51-75. doi: doi:10.1016/S0306-9192(02)00070-2
25. Larson LM, Yousafzai AK. A meta-analysis of nutrition interventions on mental development of children under-two in low- and middle-income countries. *Matern Child Nutr* 2017;13(1) doi: 10.1111/mcn.12229
26. De-Regil LM, Suchdev PS, Vist GE, et al. Home fortification of foods with multiple micronutrient powders for health and nutrition in children under two years of age. *Cochrane database of systematic reviews* 2011;9:CD008959. doi: 10.1002/14651858.CD008959.pub2 [published Online First: 2011/09/09]
27. Yousafzai AK, Rasheed MA, Rizvi A, et al. Effect of integrated responsive stimulation and nutrition interventions in the Lady Health Worker programme in Pakistan on child development, growth, and health outcomes: a cluster-randomised factorial effectiveness trial. *Lancet* 2014;384(9950):1282-93. doi: 10.1016/S0140-6736(14)60455-4
28. Yousafzai AK, Obradovic J, Rasheed MA, et al. Effects of responsive stimulation and nutrition interventions on children's development and growth at age 4 years in a disadvantaged population in Pakistan: a longitudinal follow-up of a cluster-randomised factorial effectiveness trial. *Lancet Glob Health* 2016;4(8):e548-58. doi: 10.1016/S2214-109X(16)30100-0
29. WHO/UNICEF/UNU. Iron Deficiency Anaemia: Assessment, Prevention, and Control. A guide for programme managers. Geneva: World Health Organization 2001.
30. Sachdev H, Gera T, Nestel P. Effect of iron supplementation on physical growth in children: systematic review of randomised controlled trials. *Public Health Nutr* 2006;9(7):904-20.
31. Sazawal S, Black RE, Ramsan M, et al. Effects of routine prophylactic supplementation with iron and folic acid on admission to hospital and mortality in preschool children in a high malaria transmission setting: community-based, randomised, placebo-controlled trial. *Lancet* 2006;367(9505):133-43. doi: S0140-6736(06)67962-2 [pii] 10.1016/S0140-6736(06)67962-2 [published Online First: 2006/01/18]
32. Soofi S, Cousens S, Iqbal SP, et al. Effect of provision of daily zinc and iron with several micronutrients on growth and morbidity among young children in Pakistan: a cluster-

- 1  
2  
3 randomised trial. *Lancet* 2013 doi: 10.1016/S0140-6736(13)60437-7 [published Online  
4 First: 2013/04/23]
- 5  
6 33. Zlotkin S, Newton S, Aimone AM, et al. Effect of iron fortification on malaria incidence in  
7 infants and young children in Ghana: a randomized trial. *JAMA* 2013;310(9):938-47. doi:  
8 10.1001/jama.2013.277129
- 9 34. National Institute of Population Research and Training (NIPORT) MaA all. Bangladesh -  
10 Demographic and Health Survey 2011. Dhaka, Bangladesh and Calverton, Maryland,  
11 USA: NIPORT, Mitra and Associates, and ICF International, 2013.
- 12 35. Haque U, Overgaard HJ, Clements AC, et al. Malaria burden and control in Bangladesh and  
13 prospects for elimination: an epidemiological and economic assessment. *The Lancet*  
14 *Global Health* 2014;2(2):e98-e105.
- 15 36. Kinniburgh D, Smedley P. Arsenic contamination of groundwater in Bangladesh. 2001
- 16 37. WHO Guidelines Approved by the Guidelines Review Committee. Guideline: Use of Multiple  
17 Micronutrient Powders for Home Fortification of Foods Consumed by Infants and  
18 Children 6-23 Months of Age. Geneva: World Health Organization; Copyright (c) World  
19 Health Organization 2011. 2011.
- 20 38. WHO Guidelines Approved by the Guidelines Review Committee. Guideline: Daily Iron  
21 Supplementation in Infants and Children. Geneva: World Health Organization; Copyright  
22 (c) World Health Organization 2016. 2016.
- 23 39. Bayley N. Bayley Scales of Infant and Toddler Development: Motor Scale: Psychological  
24 Corporation 2006.
- 25 40. Hamadani JD, Baker-Henningham H, Tofail F, et al. Validity and reliability of mothers'  
26 reports of language development in 1-year-old children in a large-scale survey in  
27 Bangladesh. *Food and nutrition bulletin* 2010;31(2\_suppl2):S198-S206.
- 28 41. Tofail F, Persson LÅ, El Arifeen S, et al. Effects of prenatal food and micronutrient  
29 supplementation on infant development: a randomized trial from the Maternal and Infant  
30 Nutrition Interventions, Matlab (MINIMat) study. *The American journal of clinical nutrition*  
31 2008;87(3):704-11.
- 32 42. Parveen M, Rahman ST, Islam S, et al. Adaptation of items of bayley scales of infant  
33 development-II (BSID-II) suitable for Bangladeshi infants. *Dhaka University Journal of*  
34 *Biological Sciences* 2014;23(2):187-95.
- 35 43. Jiang NM, Tofail F, Moonah SN, et al. Febrile illness and pro-inflammatory cytokines are  
36 associated with lower neurodevelopmental scores in Bangladeshi infants living in  
37 poverty. *BMC pediatrics* 2014;14(1):50.
- 38 44. Wolke D, Skuse D, Mathisen B. Behavioral style in failure-to-thrive infants: a preliminary  
39 communication. *Journal of Pediatric Psychology* 1990;15(2):237-54.
- 40 45. Bayley N. Manual for the Bayley Scales of Infant Development II. *San Antonio, TX: The*  
41 *Psychological Corporation* 1993
- 42 46. Coates J, Swindale A, Bilinsky P. Household Food Insecurity Access Scale (HFIAS) for  
43 Measurement of Food Access: Indicator Guide v. 3. 2007. *Washington, DC: Food and*  
44 *Nutrition Technical Assistance Project (FANTA), Academy for Educational Development,*  
45 *Google Scholar*
- 46 47. Hamadani JD, Tofail F, Hilaly A, et al. Use of family care indicators and their relationship  
47 with child development in Bangladesh. *Journal of Health, Population and Nutrition*  
48 2010:23-33.
- 49 48. Organization WH. WHO child growth standards: length/height for age, weight-for-age,  
50 weight-for-length, weight-for-height and body mass index-for-age, methods and  
51 development: World Health Organization 2006.
- 52 49. Lind T, Lonnerdal B, Stenlund H, et al. A community-based randomized controlled trial of  
53 iron and zinc supplementation in Indonesian infants: effects on growth and development.  
54 *Am J Clin Nutr* 2004;80(3):729-36. [published Online First: 2004/08/24]
- 55  
56  
57  
58  
59  
60



- 1  
2  
3 50. Hamadani JD, Tofail F, Huda SN, et al. Cognitive deficit and poverty in the first 5 years of  
4 childhood in Bangladesh. *Pediatrics* 2014;134(4):e1001-8. doi: 10.1542/peds.2014-0694  
5  
6 51. Thalassaemia and abnormal haemoglobins in pregnancy Melbourne [Available from:  
7 <http://www.thewomens.org.au/ThalassaemiaandAbnormalHaemoglobinsinPregnancy>  
8 accessed 30th December 2007.  
9  
10  
11  
12  
13  
14  
15  
16  
17  
18  
19  
20  
21  
22  
23  
24  
25  
26  
27  
28  
29  
30  
31  
32  
33  
34  
35  
36  
37  
38  
39  
40  
41  
42  
43  
44  
45  
46  
47  
48  
49  
50  
51  
52  
53  
54  
55  
56  
57  
58  
59  
60

For peer review only

Figure 1: Trial Design

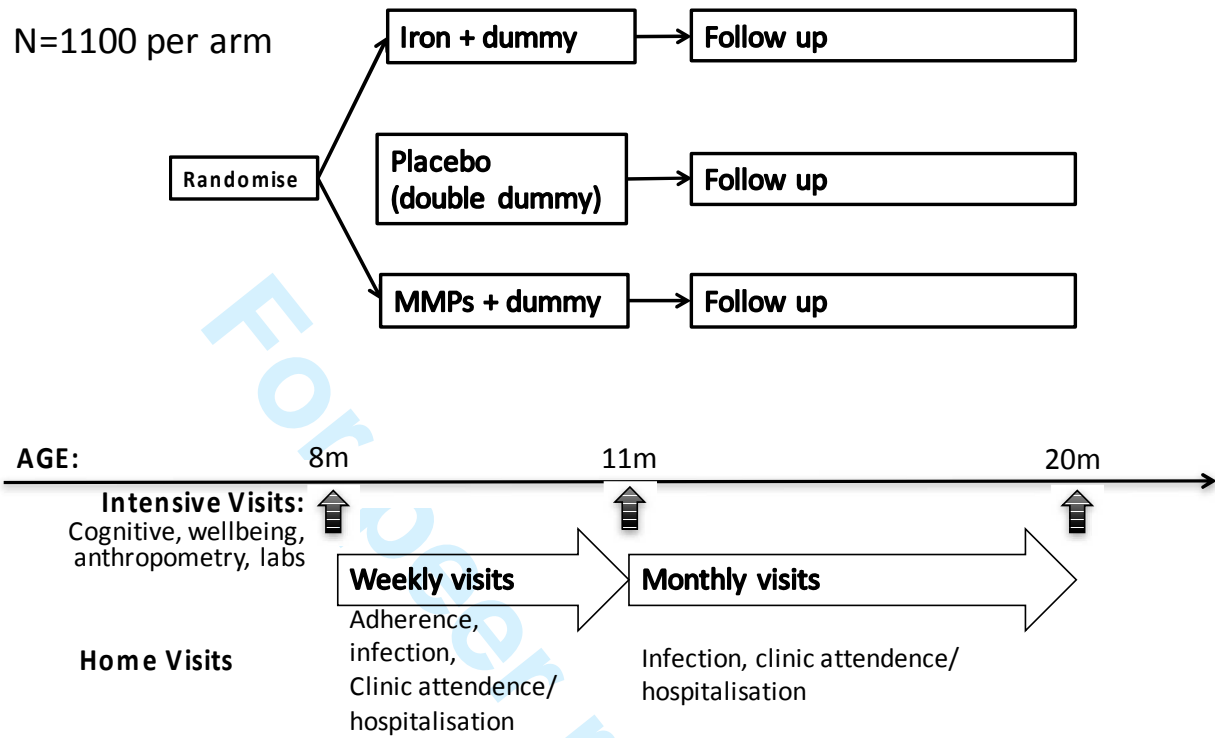

Figure 2: CONSORT Flow Diagram for the BRISC Trial

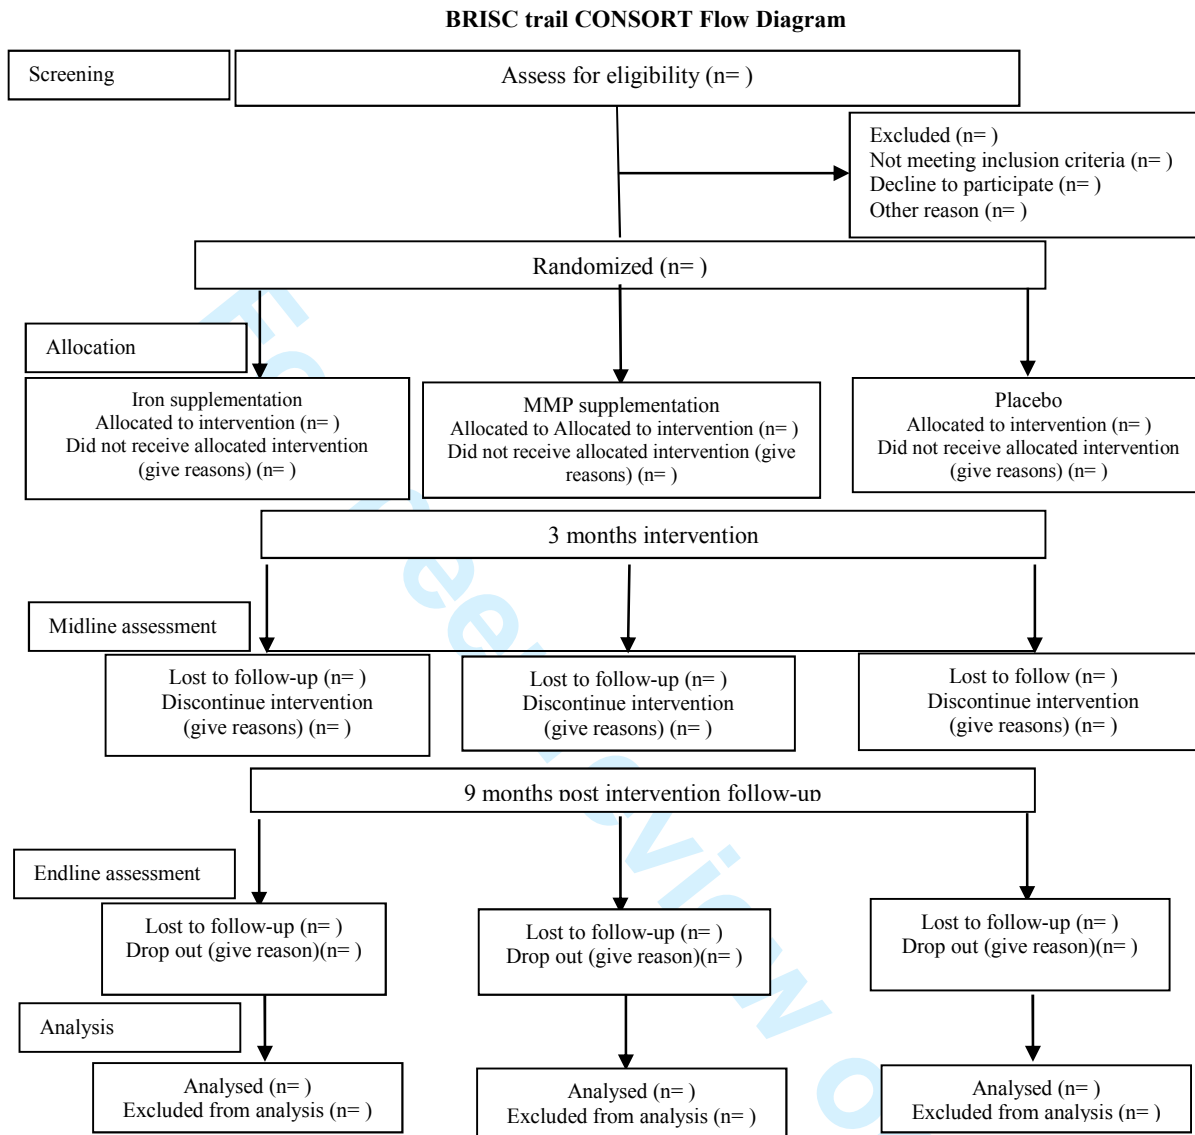

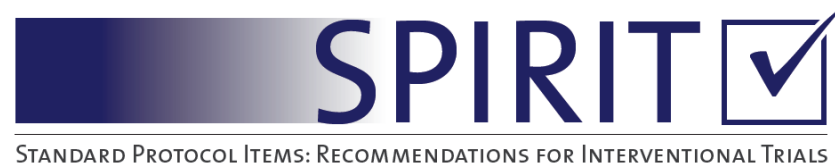

SPIRIT 2013 Checklist: Recommended items to address in a clinical trial protocol and related documents\*

| Section/item                      | Item No | Description                                                                                                                                                                                                                                                                              | Addressed on page number |
|-----------------------------------|---------|------------------------------------------------------------------------------------------------------------------------------------------------------------------------------------------------------------------------------------------------------------------------------------------|--------------------------|
| <b>Administrative information</b> |         |                                                                                                                                                                                                                                                                                          |                          |
| Title                             | 1       | Descriptive title identifying the study design, population, interventions, and, if applicable, trial acronym                                                                                                                                                                             | __1__                    |
| Trial registration                | 2a      | Trial identifier and registry name. If not yet registered, name of intended registry                                                                                                                                                                                                     | __3__                    |
|                                   | 2b      | All items from the World Health Organization Trial Registration Data Set                                                                                                                                                                                                                 | __3__                    |
| Protocol version                  | 3       | Date and version identifier                                                                                                                                                                                                                                                              | __3__                    |
| Funding                           | 4       | Sources and types of financial, material, and other support                                                                                                                                                                                                                              | __17__                   |
| Roles and responsibilities        | 5a      | Names, affiliations, and roles of protocol contributors                                                                                                                                                                                                                                  | __1, 17__                |
|                                   | 5b      | Name and contact information for the trial sponsor                                                                                                                                                                                                                                       | __1, 17__                |
|                                   | 5c      | Role of study sponsor and funders, if any, in study design; collection, management, analysis, and interpretation of data; writing of the report; and the decision to submit the report for publication, including whether they will have ultimate authority over any of these activities | __N/A__                  |
|                                   | 5d      | Composition, roles, and responsibilities of the coordinating centre, steering committee, endpoint adjudication committee, data management team, and other individuals or groups overseeing the trial, if applicable (see Item 21a for data monitoring committee)                         | __N/A__                  |

|    |                                                           |     |                                                                                                               |             |
|----|-----------------------------------------------------------|-----|---------------------------------------------------------------------------------------------------------------|-------------|
| 1  | <b>Introduction</b>                                       |     |                                                                                                               |             |
| 2  |                                                           |     |                                                                                                               |             |
| 3  | Background and                                            | 6a  | Description of research question and justification for undertaking the trial, including summary of relevant   | ___ 4 ___   |
| 4  | rationale                                                 |     | studies (published and unpublished) examining benefits and harms for each intervention                        |             |
| 5  |                                                           |     |                                                                                                               |             |
| 6  |                                                           | 6b  | Explanation for choice of comparators                                                                         | ___ 4-6 ___ |
| 7  |                                                           |     |                                                                                                               |             |
| 8  | Objectives                                                | 7   | Specific objectives or hypotheses                                                                             | ___ 7 ___   |
| 9  |                                                           |     |                                                                                                               |             |
| 10 | Trial design                                              | 8   | Description of trial design including type of trial (eg, parallel group, crossover, factorial, single group), |             |
| 11 |                                                           |     | allocation ratio, and framework (eg, superiority, equivalence, noninferiority, exploratory)                   | ___ 7 ___   |
| 12 |                                                           |     |                                                                                                               |             |
| 13 |                                                           |     |                                                                                                               |             |
| 14 | <b>Methods: Participants, interventions, and outcomes</b> |     |                                                                                                               |             |
| 15 |                                                           |     |                                                                                                               |             |
| 16 | Study setting                                             | 9   | Description of study settings (eg, community clinic, academic hospital) and list of countries where data will | ___ 7 ___   |
| 17 |                                                           |     | be collected. Reference to where list of study sites can be obtained                                          |             |
| 18 |                                                           |     |                                                                                                               |             |
| 19 | Eligibility criteria                                      | 10  | Inclusion and exclusion criteria for participants. If applicable, eligibility criteria for study centres and  | ___ 8 ___   |
| 20 |                                                           |     | individuals who will perform the interventions (eg, surgeons, psychotherapists)                               |             |
| 21 |                                                           |     |                                                                                                               |             |
| 22 | Interventions                                             | 11a | Interventions for each group with sufficient detail to allow replication, including how and when they will be | ___ 8 ___   |
| 23 |                                                           |     | administered                                                                                                  |             |
| 24 |                                                           | 11b | Criteria for discontinuing or modifying allocated interventions for a given trial participant (eg, drug dose  | ___ NA ___  |
| 25 |                                                           |     | change in response to harms, participant request, or improving/worsening disease)                             |             |
| 26 |                                                           | 11c | Strategies to improve adherence to intervention protocols, and any procedures for monitoring adherence        | ___ 8 ___   |
| 27 |                                                           |     | (eg, drug tablet return, laboratory tests)                                                                    |             |
| 28 |                                                           | 11d | Relevant concomitant care and interventions that are permitted or prohibited during the trial                 | ___ 8 ___   |
| 29 |                                                           |     |                                                                                                               |             |
| 30 | Outcomes                                                  | 12  | Primary, secondary, and other outcomes, including the specific measurement variable (eg, systolic blood       | ___ 12 ___  |
| 31 |                                                           |     | pressure), analysis metric (eg, change from baseline, final value, time to event), method of aggregation (eg, |             |
| 32 |                                                           |     | median, proportion), and time point for each outcome. Explanation of the clinical relevance of chosen         |             |
| 33 |                                                           |     | efficacy and harm outcomes is strongly recommended                                                            |             |
| 34 |                                                           |     |                                                                                                               |             |
| 35 | Participant timeline                                      | 13  | Time schedule of enrolment, interventions (including any run-ins and washouts), assessments, and visits for   | ___ 12 ___  |
| 36 |                                                           |     | participants. A schematic diagram is highly recommended (see Figure)                                          |             |
| 37 |                                                           |     |                                                                                                               |             |
| 38 |                                                           |     |                                                                                                               |             |
| 39 |                                                           |     |                                                                                                               |             |
| 40 |                                                           |     |                                                                                                               |             |
| 41 |                                                           |     |                                                                                                               |             |
| 42 |                                                           |     |                                                                                                               |             |
| 43 |                                                           |     |                                                                                                               |             |
| 44 |                                                           |     |                                                                                                               |             |
| 45 |                                                           |     |                                                                                                               |             |
| 46 |                                                           |     |                                                                                                               |             |
| 47 |                                                           |     |                                                                                                               |             |

1 Sample size 14 Estimated number of participants needed to achieve study objectives and how it was determined, including clinical and statistical assumptions supporting any sample size calculations \_\_\_ 14 \_\_\_\_\_

2  
3  
4 Recruitment 15 Strategies for achieving adequate participant enrolment to reach target sample size \_\_\_ 14 \_\_\_\_\_

5  
6  
7 **Methods: Assignment of interventions (for controlled trials)**

8  
9 Allocation:

10 Sequence 16a Method of generating the allocation sequence (eg, computer-generated random numbers), and list of any \_\_\_ 9 \_\_\_\_\_  
11 generation factors for stratification. To reduce predictability of a random sequence, details of any planned restriction  
12 (eg, blocking) should be provided in a separate document that is unavailable to those who enrol participants  
13 or assign interventions

14  
15  
16 Allocation 16b Mechanism of implementing the allocation sequence (eg, central telephone; sequentially numbered, \_\_\_ 9 \_\_\_\_\_  
17 concealment opaque, sealed envelopes), describing any steps to conceal the sequence until interventions are assigned  
18 mechanism

19  
20 Implementation 16c Who will generate the allocation sequence, who will enrol participants, and who will assign participants to \_\_\_ 9 \_\_\_\_\_  
21 interventions

22 Blinding (masking) 17a Who will be blinded after assignment to interventions (eg, trial participants, care providers, outcome \_\_\_ 9 \_\_\_\_\_  
23 assessors, data analysts), and how

24  
25 17b If blinded, circumstances under which unblinding is permissible, and procedure for revealing a participant's \_\_\_ 9 \_\_\_\_\_  
26 allocated intervention during the trial

27  
28  
29  
30  
31  
32 **Methods: Data collection, management, and analysis**

33  
34 Data collection 18a Plans for assessment and collection of outcome, baseline, and other trial data, including any related \_\_\_ 9 \_\_\_\_\_  
35 methods processes to promote data quality (eg, duplicate measurements, training of assessors) and a description of  
36 study instruments (eg, questionnaires, laboratory tests) along with their reliability and validity, if known.  
37 Reference to where data collection forms can be found, if not in the protocol

38  
39  
40 18b Plans to promote participant retention and complete follow-up, including list of any outcome data to be \_\_\_ 9 \_\_\_\_\_  
41 collected for participants who discontinue or deviate from intervention protocols

|    |                                 |     |                                                                                                                                                                                                                                                                                                                                       |        |
|----|---------------------------------|-----|---------------------------------------------------------------------------------------------------------------------------------------------------------------------------------------------------------------------------------------------------------------------------------------------------------------------------------------|--------|
| 1  | Data management                 | 19  | Plans for data entry, coding, security, and storage, including any related processes to promote data quality (eg, double data entry; range checks for data values). Reference to where details of data management procedures can be found, if not in the protocol                                                                     | __16__ |
| 2  |                                 |     |                                                                                                                                                                                                                                                                                                                                       |        |
| 3  |                                 |     |                                                                                                                                                                                                                                                                                                                                       |        |
| 4  |                                 |     |                                                                                                                                                                                                                                                                                                                                       |        |
| 5  | Statistical methods             | 20a | Statistical methods for analysing primary and secondary outcomes. Reference to where other details of the statistical analysis plan can be found, if not in the protocol                                                                                                                                                              | _14__  |
| 6  |                                 |     |                                                                                                                                                                                                                                                                                                                                       |        |
| 7  |                                 |     |                                                                                                                                                                                                                                                                                                                                       |        |
| 8  |                                 | 20b | Methods for any additional analyses (eg, subgroup and adjusted analyses)                                                                                                                                                                                                                                                              | _14__  |
| 9  |                                 |     |                                                                                                                                                                                                                                                                                                                                       |        |
| 10 |                                 | 20c | Definition of analysis population relating to protocol non-adherence (eg, as randomised analysis), and any statistical methods to handle missing data (eg, multiple imputation)                                                                                                                                                       | _14__  |
| 11 |                                 |     |                                                                                                                                                                                                                                                                                                                                       |        |
| 12 |                                 |     |                                                                                                                                                                                                                                                                                                                                       |        |
| 13 |                                 |     |                                                                                                                                                                                                                                                                                                                                       |        |
| 14 |                                 |     |                                                                                                                                                                                                                                                                                                                                       |        |
| 15 | <b>Methods: Monitoring</b>      |     |                                                                                                                                                                                                                                                                                                                                       |        |
| 16 |                                 |     |                                                                                                                                                                                                                                                                                                                                       |        |
| 17 | Data monitoring                 | 21a | Composition of data monitoring committee (DMC); summary of its role and reporting structure; statement of whether it is independent from the sponsor and competing interests; and reference to where further details about its charter can be found, if not in the protocol. Alternatively, an explanation of why a DMC is not needed | __16__ |
| 18 |                                 |     |                                                                                                                                                                                                                                                                                                                                       |        |
| 19 |                                 |     |                                                                                                                                                                                                                                                                                                                                       |        |
| 20 |                                 |     |                                                                                                                                                                                                                                                                                                                                       |        |
| 21 |                                 |     |                                                                                                                                                                                                                                                                                                                                       |        |
| 22 |                                 | 21b | Description of any interim analyses and stopping guidelines, including who will have access to these interim results and make the final decision to terminate the trial                                                                                                                                                               | _16__  |
| 23 |                                 |     |                                                                                                                                                                                                                                                                                                                                       |        |
| 24 |                                 |     |                                                                                                                                                                                                                                                                                                                                       |        |
| 25 |                                 |     |                                                                                                                                                                                                                                                                                                                                       |        |
| 26 | Harms                           | 22  | Plans for collecting, assessing, reporting, and managing solicited and spontaneously reported adverse events and other unintended effects of trial interventions or trial conduct                                                                                                                                                     | _12__  |
| 27 |                                 |     |                                                                                                                                                                                                                                                                                                                                       |        |
| 28 |                                 |     |                                                                                                                                                                                                                                                                                                                                       |        |
| 29 | Auditing                        | 23  | Frequency and procedures for auditing trial conduct, if any, and whether the process will be independent from investigators and the sponsor                                                                                                                                                                                           | _16__  |
| 30 |                                 |     |                                                                                                                                                                                                                                                                                                                                       |        |
| 31 |                                 |     |                                                                                                                                                                                                                                                                                                                                       |        |
| 32 |                                 |     |                                                                                                                                                                                                                                                                                                                                       |        |
| 33 | <b>Ethics and dissemination</b> |     |                                                                                                                                                                                                                                                                                                                                       |        |
| 34 |                                 |     |                                                                                                                                                                                                                                                                                                                                       |        |
| 35 | Research ethics approval        | 24  | Plans for seeking research ethics committee/institutional review board (REC/IRB) approval                                                                                                                                                                                                                                             | __16__ |
| 36 |                                 |     |                                                                                                                                                                                                                                                                                                                                       |        |
| 37 |                                 |     |                                                                                                                                                                                                                                                                                                                                       |        |
| 38 | Protocol amendments             | 25  | Plans for communicating important protocol modifications (eg, changes to eligibility criteria, outcomes, analyses) to relevant parties (eg, investigators, REC/IRBs, trial participants, trial registries, journals, regulators)                                                                                                      | __17__ |
| 39 |                                 |     |                                                                                                                                                                                                                                                                                                                                       |        |
| 40 |                                 |     |                                                                                                                                                                                                                                                                                                                                       |        |
| 41 |                                 |     |                                                                                                                                                                                                                                                                                                                                       |        |
| 42 |                                 |     |                                                                                                                                                                                                                                                                                                                                       |        |
| 43 |                                 |     |                                                                                                                                                                                                                                                                                                                                       |        |
| 44 |                                 |     |                                                                                                                                                                                                                                                                                                                                       |        |
| 45 |                                 |     |                                                                                                                                                                                                                                                                                                                                       |        |
| 46 |                                 |     |                                                                                                                                                                                                                                                                                                                                       |        |
| 47 |                                 |     |                                                                                                                                                                                                                                                                                                                                       |        |

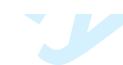

|    |                               |     |                                                                                                                                                                                                                                                                                     |                             |
|----|-------------------------------|-----|-------------------------------------------------------------------------------------------------------------------------------------------------------------------------------------------------------------------------------------------------------------------------------------|-----------------------------|
| 1  | Consent or assent             | 26a | Who will obtain informed consent or assent from potential trial participants or authorised surrogates, and how (see Item 32)                                                                                                                                                        | __17__                      |
| 2  |                               |     |                                                                                                                                                                                                                                                                                     |                             |
| 3  |                               |     |                                                                                                                                                                                                                                                                                     |                             |
| 4  |                               | 26b | Additional consent provisions for collection and use of participant data and biological specimens in ancillary studies, if applicable                                                                                                                                               | __17__                      |
| 5  |                               |     |                                                                                                                                                                                                                                                                                     |                             |
| 6  |                               |     |                                                                                                                                                                                                                                                                                     |                             |
| 7  | Confidentiality               | 27  | How personal information about potential and enrolled participants will be collected, shared, and maintained in order to protect confidentiality before, during, and after the trial                                                                                                | _____                       |
| 8  |                               |     |                                                                                                                                                                                                                                                                                     |                             |
| 9  |                               |     |                                                                                                                                                                                                                                                                                     |                             |
| 10 | Declaration of interests      | 28  | Financial and other competing interests for principal investigators for the overall trial and each study site                                                                                                                                                                       | _____                       |
| 11 |                               |     |                                                                                                                                                                                                                                                                                     |                             |
| 12 |                               |     |                                                                                                                                                                                                                                                                                     |                             |
| 13 | Access to data                | 29  | Statement of who will have access to the final trial dataset, and disclosure of contractual agreements that limit such access for investigators                                                                                                                                     | _____                       |
| 14 |                               |     |                                                                                                                                                                                                                                                                                     |                             |
| 15 |                               |     |                                                                                                                                                                                                                                                                                     |                             |
| 16 |                               |     |                                                                                                                                                                                                                                                                                     |                             |
| 17 | Ancillary and post-trial care | 30  | Provisions, if any, for ancillary and post-trial care, and for compensation to those who suffer harm from trial participation                                                                                                                                                       | _____                       |
| 18 |                               |     |                                                                                                                                                                                                                                                                                     |                             |
| 19 |                               |     |                                                                                                                                                                                                                                                                                     |                             |
| 20 | Dissemination policy          | 31a | Plans for investigators and sponsor to communicate trial results to participants, healthcare professionals, the public, and other relevant groups (eg, via publication, reporting in results databases, or other data sharing arrangements), including any publication restrictions | __18__                      |
| 21 |                               |     |                                                                                                                                                                                                                                                                                     |                             |
| 22 |                               |     |                                                                                                                                                                                                                                                                                     |                             |
| 23 |                               |     |                                                                                                                                                                                                                                                                                     |                             |
| 24 |                               |     |                                                                                                                                                                                                                                                                                     |                             |
| 25 |                               |     |                                                                                                                                                                                                                                                                                     |                             |
| 26 |                               | 31b | Authorship eligibility guidelines and any intended use of professional writers                                                                                                                                                                                                      | __18__                      |
| 27 |                               |     |                                                                                                                                                                                                                                                                                     |                             |
| 28 |                               | 31c | Plans, if any, for granting public access to the full protocol, participant-level dataset, and statistical code                                                                                                                                                                     | __NA__                      |
| 29 |                               |     |                                                                                                                                                                                                                                                                                     |                             |
| 30 | <b>Appendices</b>             |     |                                                                                                                                                                                                                                                                                     |                             |
| 31 |                               |     |                                                                                                                                                                                                                                                                                     |                             |
| 32 | Informed consent materials    | 32  | Model consent form and other related documentation given to participants and authorised surrogates                                                                                                                                                                                  | __Supplementary materials__ |
| 33 |                               |     |                                                                                                                                                                                                                                                                                     |                             |
| 34 |                               |     |                                                                                                                                                                                                                                                                                     |                             |
| 35 |                               |     |                                                                                                                                                                                                                                                                                     |                             |
| 36 |                               |     |                                                                                                                                                                                                                                                                                     |                             |
| 37 | Biological specimens          | 33  | Plans for collection, laboratory evaluation, and storage of biological specimens for genetic or molecular analysis in the current trial and for future use in ancillary studies, if applicable                                                                                      | __14__                      |
| 38 |                               |     |                                                                                                                                                                                                                                                                                     |                             |
| 39 |                               |     |                                                                                                                                                                                                                                                                                     |                             |



1  
2  
3  
4  
5  
6  
7  
8  
9  
10  
11  
12  
13  
14  
15  
16  
17  
18  
19  
20  
21  
22  
23  
24  
25  
26  
27  
28  
29  
30  
31  
32  
33  
34  
35  
36  
37  
38  
39  
40  
41  
42  
43  
44  
45  
46  
47

\*It is strongly recommended that this checklist be read in conjunction with the SPIRIT 2013 Explanation & Elaboration for important clarification on the items. Amendments to the protocol should be tracked and dated. The SPIRIT checklist is copyrighted by the SPIRIT Group under the Creative Commons [“Attribution-NonCommercial-NoDerivs 3.0 Unported”](#) license.

For peer review only

# BMJ Open

## Benefits and Risks of Iron interventions in Children (BRISC): protocol for a three-arm parallel-group randomized controlled field trial in Bangladesh

|                                 |                                                                                                                                                                                                                                                                                                                                                                                                                                                                                                                                                                                                                                                                                                                                                                                                                                                                                                                                                                                                                                                                                             |
|---------------------------------|---------------------------------------------------------------------------------------------------------------------------------------------------------------------------------------------------------------------------------------------------------------------------------------------------------------------------------------------------------------------------------------------------------------------------------------------------------------------------------------------------------------------------------------------------------------------------------------------------------------------------------------------------------------------------------------------------------------------------------------------------------------------------------------------------------------------------------------------------------------------------------------------------------------------------------------------------------------------------------------------------------------------------------------------------------------------------------------------|
| Journal:                        | <i>BMJ Open</i>                                                                                                                                                                                                                                                                                                                                                                                                                                                                                                                                                                                                                                                                                                                                                                                                                                                                                                                                                                                                                                                                             |
| Manuscript ID                   | bmjopen-2017-018325.R1                                                                                                                                                                                                                                                                                                                                                                                                                                                                                                                                                                                                                                                                                                                                                                                                                                                                                                                                                                                                                                                                      |
| Article Type:                   | Protocol                                                                                                                                                                                                                                                                                                                                                                                                                                                                                                                                                                                                                                                                                                                                                                                                                                                                                                                                                                                                                                                                                    |
| Date Submitted by the Author:   | 01-Sep-2017                                                                                                                                                                                                                                                                                                                                                                                                                                                                                                                                                                                                                                                                                                                                                                                                                                                                                                                                                                                                                                                                                 |
| Complete List of Authors:       | Hasan, Mohammed Imrul; International Centre for Diarrhoeal Disease Research<br>Hossain, Sheikh; International Centre for Diarrhoeal Disease Research<br>Baat, Sabine ; University of Melbourne School of Population and Global Health, Centre for Epidemiology and Biostatistics<br>Dibley, Michael; The University of Sydney, International Public Health<br>School of Public Health, International Public Health<br>Fisher, Jane; Monash University, Jean Hailes Research Unit, School of Public Health and Preventative Medicine<br>Grantham-McGregor , Sally ; University College London<br>Tofail, Fahmida; International Centre for Diarrhoeal Disease Research, Centre for Nutrition & Food Security<br>Simpson, Julie; University of Melbourne School of Population and Global Health,<br>Arifeen, Shams E.; ICDDR B, Maternal and Child Health Division (MCHD)<br>Hamadani, Jena; International Centre for Diarrhoeal Disease Research<br>Biggs, Beverley-Ann ; The University of Melbourne, Medicine<br>Pasricha, Sant-Rayn; The Royal Melbourne Hospital, Department of Medicine |
| <b>Primary Subject Heading</b>: | Public health                                                                                                                                                                                                                                                                                                                                                                                                                                                                                                                                                                                                                                                                                                                                                                                                                                                                                                                                                                                                                                                                               |
| Secondary Subject Heading:      | Neurology, Paediatrics, Nutrition and metabolism, Health economics                                                                                                                                                                                                                                                                                                                                                                                                                                                                                                                                                                                                                                                                                                                                                                                                                                                                                                                                                                                                                          |
| Keywords:                       | Iron deficiency, cognitive development, Bangladesh, randomized controlled trial, children, Anaemia < HAEMATOLOGY                                                                                                                                                                                                                                                                                                                                                                                                                                                                                                                                                                                                                                                                                                                                                                                                                                                                                                                                                                            |
|                                 |                                                                                                                                                                                                                                                                                                                                                                                                                                                                                                                                                                                                                                                                                                                                                                                                                                                                                                                                                                                                                                                                                             |

SCHOLARONE™  
Manuscripts

1  
2  
3 **Benefits and Risks of Iron interventions in Children (BRISC): protocol for a three-arm**  
4 **parallel-group randomized controlled field trial in Bangladesh**  
5  
6  
7

8 **Corresponding author:**

9 Dr Sant-Rayn Pasricha  
10 Department of Medicine, The Royal Melbourne Hospital,  
11 University of Melbourne, Parkville, Australia  
12 [Sant-Rayn.Pasricha@unimelb.edu.au](mailto:Sant-Rayn.Pasricha@unimelb.edu.au)  
13  
14  
15  
16 +613 8344 3257  
17  
18

19 **Authors**

20  
21 Mohammed Imrul Hasan, Maternal and Child Health Division, International Centre for Diarrhoeal  
22 Disease Research, Dhaka, Bangladesh  
23  
24 Sheikh Jamal Hossain, Maternal and Child Health Division, International Centre for Diarrhoeal  
25 Disease Research, Dhaka, Bangladesh  
26  
27 Sabine Braat, Centre for Epidemiology and Biostatistics, Melbourne School of Population and  
28 Global Health and Melbourne Clinical And Translational Sciences (MCATS), University of  
29 Melbourne, Australia  
30  
31 Michael Dibley, School of Public Health, University of Sydney, Sydney Australia,  
32  
33 Jane Fisher, School of Public Health and Preventive Medicine, Monash University.  
34  
35 Sally Grantham-McGregor, Emeritus Professor, Centre for International Child Health, UCL  
36  
37 Fahmida Tofail, Nutrition and Clinical Services Division, International Centre for Diarrhoeal  
38 Disease Research, Dhaka, Bangladesh.  
39  
40 Julie A Simpson, Centre for Epidemiology and Biostatistics, Melbourne School of Population  
41 and Global Health, and Melbourne Clinical And Translational Sciences (MCATS), University of  
42 Melbourne, Australia  
43  
44 Shams El Arifeen, Maternal and Child Health Division, International Centre for Diarrhoeal  
45 Disease Research, Dhaka, Bangladesh.  
46  
47 Jena Hamadani, Maternal and Child Health Division, International Centre for Diarrhoeal Disease  
48 Research, Dhaka, Bangladesh.  
49  
50 Beverley-Ann Biggs, Department of Medicine, Doherty Institute, Melbourne, Australia  
51  
52 Sant-Rayn Pasricha, Department of Medicine, The Royal Melbourne Hospital, Melbourne,  
53  
54  
55  
56  
57  
58  
59  
60

MIH and SJH contributed equally to this paper. JH, BB and SP contributed equally to this paper.

For peer review only

**Abstract**

**Introduction:** Anaemia is a major global health problem affecting about 43% of pre-school children globally and 60% of 6-24 months old children in rural Bangladesh, half of which is attributed to iron deficiency (ID). Although the World Health Organization (WHO) recommends universal supplementation with iron or home fortification with iron-containing multiple micronutrient powders (MMPs) to children under 2 years, evidence for benefits of these interventions on childhood development (a key rationale for these interventions) and harms (especially infection) remains limited. This study aims to evaluate the impact of iron or MMPs supplementation compared to placebo on a) children's development b) growth c) morbidity from infections, and d) haematologic and iron indices.

**Methods and analysis:** This study is a three-arm, blinded, double dummy, parallel-group, placebo controlled superiority trial using stratified individual block randomization. The trial will randomise 3300 children aged 8-9 months equally to Arm 1: iron syrup (12.5mg elemental iron), placebo MMPs; Arm 2: MMPs (including 12.5mg elemental iron), placebo syrup; and Arm 3: placebo syrup, placebo MNPs. Children will receive interventions for 3 months based on WHO recommendations and then be followed-up for 9 months post-intervention. The primary outcome is cognitive composite score measured by Bayley-III. Secondary outcomes include motor and language composite score by Bayley-III, behaviour rating using selected items from Wolke's rating scales and BSID-II behaviour ratings, temperament, growth, haemoglobin, anaemia and iron status, and infectious morbidity. Outcomes will be measured at baseline, at the end of 3-month intervention, and after 9 months post-intervention follow-up.

**Ethics and dissemination:** The trial has been approved by the Ethical Review Committee of icddr,b (Dhaka, Bangladesh) and the Melbourne Health Human Research Ethics Committee (Melbourne, Australia). Results of the study will be disseminated through scientific publications, presentations at international meetings, and policy briefs to key stakeholders.

**Trial registration number** ACTRN12617000660381

**WHO Universal Trial Number** U1111-1196-1125

**Keywords** Iron deficiency, anaemia, cognitive development, Bangladesh, randomized controlled trial

**Version 1, June 19<sup>th</sup> 2017**

## Strengths and Limitations

- Trial design: double blind, double dummy design minimizing risk of bias in assessment of outcomes. The trial is designed to be able to compare the main interventions (iron drops and iron-containing micronutrient powders) used for anaemia control in young children against placebo.
- Outcome assessment: The tools we are using, including Bayley Scales, are the gold standard for directly measuring child development.
- Sample size: this is the largest trial to assess effects of iron interventions on child development, and as such the trial is powered to detect small but clinically relevant effect sizes.
- Trial setting: the trial is set in a low income South Asian setting where there is a high baseline prevalence of anaemia, and will exclude children at risk of high groundwater iron exposure.
- Biomarker assessment: measurement of anaemia and iron deficiency, along with growth, at baseline will facilitate subgroup analysis by baseline nutrition status.
- We will exclude children with Hb<8gm/dl to ensure they are referred for treatment, which means we will not have a chance to assess the effects of iron interventions on cognitive performance in this group at perhaps higher risk; similarly, children with severe malnutrition are also excluded. Our data may therefore not be able to generalized to children with severe anaemia or malnutrition.

## BACKGROUND

### Anaemia is highly prevalent in preschool children

Approximately 43% (up to 304 million) of under-5 children worldwide are anaemic. The number of children affected is greatest in South Asia, where the prevalence exceeds 55%.<sup>1</sup> The relative contribution of iron deficiency (ID) to the overall burden of anaemia varies by region. We have previously found that among rural Indian children aged 12-23 months, ID accounted for 72% of anaemia.<sup>2</sup> In rural Bangladesh, we found about 60% of children 6-24 months to be anaemic, with half of cases due to ID.<sup>3</sup> Conversely, in pre-schoolers in rural Gambia and Tanzania where malaria is endemic, ID accounted for only 20% of anaemia.<sup>4</sup>

### Iron supplementation as a strategy for controlling anaemia in children in low-income settings

Iron supplementation involves administration of medicinal iron (usually ferrous salts).<sup>5</sup> Multiple micronutrient powders (MMPs) comprise single dose sachets of lipoencapsulated iron together with other micronutrients (usually at least vitamin A, zinc and folate) that can be sprinkled onto any semi-solid food, with the aim of providing a child with a recommended daily intake of micronutrients. The World Health Organization (WHO) recommends two different possible direct interventions for controlling anaemia in young children. Firstly, WHO recommends that all children aged 6-23 months, in settings where the prevalence of anaemia exceeds 40%, receive 3 months daily iron supplements.<sup>6</sup> Alternatively, where the prevalence of anaemia exceeds 20%, WHO recommends children 6-23 months receive 90 days home fortification with iron-containing multiple micronutrients powders (MMPs) every six months.<sup>7</sup> WHO does not recommend one approach over the other; their efficacy and safety have not been compared in a large head to head trial; earlier recommendations for MMPs proposed 2 months intervention every six months. Recent estimates indicate that in pre-school children, about 41% and 32% of cases of anaemia in South-East Asia and sub-Saharan Africa respectively, are responsive to iron.<sup>8</sup>

### Adequate iron stores are important for neurological development

The prevalence of anaemia generally increases from 6 months of age and peaks in the second year of life,<sup>9</sup> especially if iron intake from complementary foods is inadequate to meet the demands of erythropoiesis and growth.<sup>10,11</sup> The peak in anaemia prevalence coincides with the critical period for neural development, sharing the same period of peak vulnerability: the 'first 1000 days' from conception to age 2 years.<sup>12</sup> Animal studies also indicate that iron is needed for

1  
2  
3 myelination and neurotransmitter synthesis, while ID alters neuronal  
4 metabolism.<sup>13,14</sup> Observational studies have consistently linked anaemia in infancy to adverse  
5 short and longer term deficits in cognitive development.<sup>15</sup> Hence, animal data and observational  
6 studies in children suggest that ID impairs brain development.<sup>16</sup>  
7  
8  
9

### 11 **Evidence of beneficial effects of iron interventions in children at the population level**

12 While iron interventions improve haemoglobin concentrations and iron indices and reduce the  
13 prevalence of anaemia, ID, and iron deficiency anaemia (IDA),<sup>17-19</sup> there are limited data from  
14 population clinical trials confirming that policies of universal iron interventions improve  
15 development, growth and health in young children.  
16  
17  
18  
19

20  
21 *Effects on development:* Few RCTs have evaluated effects of iron supplements or MMPs on  
22 development in children under 2 years<sup>18,20</sup> and these trials were underpowered individually and  
23 collectively and most of the trials were in pre-selected patient groups (not populations) or were  
24 not blinded (i.e. high risk of bias) limiting the quality of evidence.<sup>18</sup> This paucity of available  
25 evidence has hampered systematic reviews and meta-analyses (RCTs) that have to date failed  
26 to find evidence of benefit from iron interventions (iron supplements, home fortification with  
27 MMPs, or other iron interventions) on development in young children.<sup>21-24</sup> Our systematic review  
28 of daily iron supplementation in children aged 4-23 months identified no significant difference in  
29 Bayley's mental development index (MDI) in children receiving iron compared with control  
30 (mean difference 1.65 [95% confidence interval -0.63, 3.94]); for psychomotor development  
31 index (PDI) the effect size was (mean difference 1.05 [-1.36, 3.46]).<sup>18</sup>  
32  
33

34 Systematic reviews evaluating the effects of MMPs on cognitive development did not identify  
35 RCTs that had reported effects on measures of cognitive development,<sup>25,26</sup> and only reported a  
36 single trial that found children receiving an intervention walked earlier than those from a parallel  
37 control group (i.e. children not included in the study at inception). More recently, a large  
38 randomized trial in Pakistan identified only transient benefits from MMPs on Bayley's cognitive,  
39 language and psychomotor development,<sup>27</sup> and motor development in the longer term.<sup>28</sup> This  
40 trial did not use placebo and was hence not adequately blinded; moreover, adherence to the  
41 supplements appeared limited and had no effect on haemoglobin concentration compared to  
42 control children.<sup>27</sup>  
43  
44  
45  
46  
47  
48  
49  
50  
51  
52

53  
54  
55 Data regarding longer term effects of iron supplementation on children development are limited.  
56 A recent study in Thailand also documented no significant difference of IQ and school  
57  
58  
59  
60



1  
2  
3 performance at 9 years of age although the children were supplemented separately with iron  
4 and zinc for six months at age 4-6 months.<sup>29</sup> A study in Nepal also found no effect of infant iron  
5 supplementation on child's long term intelligence and executive functions.<sup>30</sup>  
6  
7  
8

9  
10 *Effects on growth:* Benefits on growth are often cited as a rationale for universal iron  
11 supplementation.<sup>31</sup> However previous systematic reviews have not found benefits on growth,  
12 and indeed, have found that iron interventions can impair linear growth in iron-replete children.<sup>32</sup>  
13 Our systematic review suggested daily iron supplementation reduced length and weight gain in  
14 young children.<sup>18</sup> A systematic review of iron-containing MMPs found no increase in growth  
15 despite containing the growth-promoting micronutrient zinc.<sup>20</sup>  
16  
17  
18  
19  
20

### 21 **Evidence of harm from iron supplementation**

22 In contrast to the lack of data on benefits, several large RCTs have reported adverse effects  
23 from iron interventions in low-income settings. This emerging data along with mechanistic  
24 studies in low-income settings are now providing convincing evidence that these interventions  
25 cause or exacerbate infection, including diarrhea, bloody diarrhea, and respiratory infections in  
26 endemic and non-endemic malaria settings.<sup>27,33-35</sup> For example, our meta-analysis of iron  
27 supplementation identified a 16% and 38% increased risk of fever and vomiting respectively.<sup>18</sup>  
28  
29  
30  
31  
32  
33

### 34 **The need for a trial**

35 Although immediate and long-term benefits from iron on functional outcomes such as cognitive  
36 development and growth have been assumed for decades, existing data from RCTs do not  
37 support this contention. In contrast, data for evidence of harm from iron interventions is  
38 accumulating. Furthermore, iron supplements have not been compared directly to MMPs in a  
39 large field trial. In this RCT, we aim to define the benefits and harms of daily iron  
40 supplementation and MMPs in young children, enabling evidence-based recommendations for  
41 implementation (or withdrawal) of iron interventions in this age group.  
42  
43  
44  
45  
46  
47  
48  
49  
50  
51  
52  
53  
54  
55  
56  
57  
58  
59  
60

## METHODS AND ANALYSIS

### *Benefits and risks of iron interventions in children (BRISC)*

#### **Trial objectives**

The primary objective of this study is to determine if 3 months interventions with iron supplementation or home fortification with MMPs is superior to placebo on cognitive development in children aged 8 months  $\pm$  14 days.

The secondary objectives are to evaluate the impact of iron supplementation and home fortification with MMPs, compared with placebo, on:

- Developmental indices, i.e. cognitive (after 9 months post-intervention), and motor, language, behaviour and temperament (after 3 months intervention and 9 months post-intervention),
- Prevalence of anaemia and iron deficiency (after 3 months intervention and 9 months post-intervention), and
- Infection risks, especially diarrhoea and respiratory infection in these young children (after 3 months intervention and 9 months post-intervention).

#### **Study design**

BRISC is a three-arm; parallel; researcher, caregiver, data collector, analysts, and participant-blinded-blind; individually randomised; double-dummy placebo controlled; superiority trial. It will compare the effects of 3 months of daily i) iron supplementation, or ii) MMPs, to iii) placebo in 8 months old Bangladeshi children, with a further 9 months follow up. The trial design is summarized in Figure 1.

#### **Study settings and participants**

The trial will be conducted in Rupganj, a rural sub-district/upazila of Narayanganj district about 50km from Dhaka, in Bangladesh. Three unions (regions) within the sub-district will be included, with each union covered by a dedicated study team. A recent national survey reported the prevalence of anaemia in 9-11 months old infants at 78.7%.<sup>36</sup> Diarrhoea and respiratory infections remain highly endemic in Bangladesh, with 4.6% and 5.8% of children <5 years experiencing these respectively in a 2-week period.

Like many other developing countries, anaemia is highly prevalent in Bangladesh, and iron deficiency is expected to contribute to half the total burden of anaemia<sup>3,12</sup> Our study site,

Rupganj, is a non-malaria endemic setting in rural Bangladesh and has low ground water iron level.<sup>37,38</sup> Furthermore, we will exclude any child from a household with elevated groundwater iron. We therefore expect that results from this trial will have generalizability to other low and middle income countries where the prevalence of anaemia is high. This may include malaria endemic countries; however, the proportion of anaemia attributable to iron deficiency in such settings is lower, and the iron-infection interactions may be different. As such, iron trials in malaria-endemic countries should incorporate specific malaria prevention measures which our study does not require. Our study team is also proposing a similar study in Malawi where malaria is endemic, incorporating the requirements for malaria treatment or prevention.

### Eligibility Criteria

Children will be randomised only if they fulfill all the inclusion criteria and none of the exclusion criteria.

Inclusion criteria:

1. Aged 8 months ( $\pm 14$  days) at the time of randomization,
2. Not expected to leave the study location for more than one week over the next 3 months, or for more than one month over the next 12 months,
3. Has a legal guardian capable of providing informed consent.

Exclusion criteria:

Children meeting any of the following criteria will be excluded from the study:

1. Capillary haemoglobin (Hb)  $< 8.0$ g/dL at the time of screening.
2. Drinking water iron concentration  $> 1$ mg/L.
3. Diagnosed case of any clinical haemoglobinopathy (e.g. beta-thalassaemia major, HbE-beta thalassaemia).
4. Current infective illness (i.e. respiratory infection, diarrhoea) with fever; however, children may be rescreened again after recovery if otherwise eligible.
5. Received iron supplements or iron-containing MMP in the previous month.
6. Known congenital anomaly, developmental disorder or severe developmental delay.
7. Child of multiple birth e.g. twins, triplets.

### Intervention

Participants will be randomised in a 1:1:1 ratio to each of the three arms. Infants in the two active intervention arms will receive 12.5 mg daily oral iron either in syrup form or as MMPs as

1  
2  
3 recommended by WHO.<sup>39,40</sup> Each participant will receive both a syrup (to be dispensed via a  
4 syringe at a predefined volume) and a sachet (to be sprinkled on food), achieving double  
5 dummy blinding. Iron syrup and the corresponding placebo will be manufactured in Bangladesh  
6 by ACME Laboratories. Micronutrient powders and corresponding placebo will be manufactured  
7 by Renata Ltd. Mothers/caregivers will be instructed (with demonstrations) how to administer  
8 the supplements. Participants will be asked to take one dose of each formulation daily for 3  
9 months.  
10  
11  
12  
13

14  
15  
16 Intervention arms:

17  
18 *Arm 1: (Iron syrup and placebo sachet):* Daily oral supplementation of 12.5 mg elemental iron  
19 syrup and a placebo sachet containing powders in identical packaging to the MMP, but  
20 containing no micronutrients.  
21

22  
23 *Arm 2 (MMP sachet and placebo syrup):* Daily home-fortification with an MMP sachet containing  
24 12.5 mg Iron, 0.3 mg Vitamin A, 30 mg Vitamin C, 0.16 mg Folic Acid, and 5 mg Zinc; placebo  
25 syrup containing no iron but identical in colour and flavour.  
26

27  
28 *Arm 3: (Placebo syrup and placebo sachet):* Control arm.

29 Each participant will receive a pouch every week containing a bottle of syrup and 7 sachets.  
30  
31

### 32 **Randomisation**

33  
34 Participants will be randomly allocated to one of the three arms with 1:1:1 allocation using a  
35 computer-generated schedule of randomly permuted blocks of fixed size stratified by sex and  
36 union (each covered by a different field team) to achieve balance between the arms within each  
37 stratum. The randomisation list will be prepared by an independent statistician, who will not  
38 reveal the block size. The allocation will occur by the field team according to the list, within their  
39 assigned union, once eligibility criteria have been checked.  
40  
41  
42  
43  
44

### 45 **Allocation concealment and blinding of study agents**

46  
47 Blinding of the team visiting the site, the caregiver(s), and participants will be achieved through  
48 the use of identical packaging of sachets and syrup regardless of their contents (active or  
49 placebo), packaged in pouches that carry an allocation code. The independent statistician will  
50 hold the allocation codes until the data base is ready for unblinding. Researchers, caregivers,  
51 persons involved with data collection (i.e. field team) or analysis will be blinded to the allocation  
52 code until the database has been finalized for analysis. Breaking of the allocation code will  
53 occur only in the case of a severe adverse event or as requested by Data Safety Monitoring  
54  
55  
56  
57  
58  
59  
60

1  
2  
3 Board (DSMB), in which case the code will only be disclosed to the local study physician.  
4  
5 Emergency unblinding will lead to discontinuation of the participant's involvement in the study.  
6  
7

### 8 **Recruitment and visits**

9  
10 The schedule of visits is outline in Table 1. Trained Village Health Workers (VHWs) will identify  
11 all potentially eligible children by making household visits in their designated areas and collating  
12 these data centrally, enabling generation of a list of age-specific eligible participants in each  
13 village. Based on the list, VHWs and Senior Field Assistants (SFAs) will visit potentially eligible  
14 families. After providing preliminary information to the parents/guardians, the team will obtain  
15 their consent for screening and determine their eligibility. During screening, drinking water iron  
16 level will be measured using "HACH" Iron (Ferrous) test Kit and the child's capillary Hb level will  
17 be measured by *HemoCue*-301. Children with Hb<8.0 gm/dl will be excluded and referred to  
18 nearby health centre for management. Mothers/guardians of eligible children will be briefed  
19 further about the trial, and be invited to a selected house/test centre for enrollment.  
20  
21  
22  
23  
24  
25  
26

27  
28 Enrolled families will attend a designated local study site on a prescribed day for enrolment and  
29 baseline data collection. The data collection team consisting of a psychological tester, a SFA, a  
30 phlebotomist and a VHW will undertake detailed data collection. SFAs will screen children for  
31 eligibility, motivate the mothers/ guardians for participation; collect socio-economic data,  
32 household food security and willingness to pay information. At this visit, consent for  
33 participation in the study will be signed by Bayley testers .They will also collect baseline  
34 information on child's temperament, family care indicator questionnaire, administer Bayley scale  
35 of infant and toddler development (3rd edition), rate the child's behavior by using Wolke's  
36 behavior rating scale, take anthropometric measurements and finally, a study phlebotomist will  
37 collect 3 mL of venous blood. The child will then receive the randomly allocated intervention.  
38 Testers will provide detailed instruction regarding medication to mothers or caregivers before  
39 they leave the test centre and they will give details of the enrolled child to the assigned VHW for  
40 prospective follow-up visits. The assigned VHW will then visit the child every week for the 3  
41 month intervention period, and every month for the 9 month post intervention period. Morbidity  
42 data will be collected weekly and monthly during the intervention and post intervention period  
43 respectively. VHWs will also record and notify any unscheduled hospital or clinic admission  
44 experienced by the participant. The number of doses missed by participants will be recorded,  
45 empty bottles and sachets will be collected and new doses for the following week dispensed at  
46  
47  
48  
49  
50  
51  
52  
53  
54  
55  
56  
57  
58  
59  
60

routine weekly visits. A total of 23 VHWs, 05 SFAs and 10 Psychological testers are expected to be recruited and trained for this trial.

**Table 1: Overview of study visits**

| ACTIVITIES                                      | STUDY PERIOD               |                        |                                                                           |                                      |                                                                                        |                                                    |
|-------------------------------------------------|----------------------------|------------------------|---------------------------------------------------------------------------|--------------------------------------|----------------------------------------------------------------------------------------|----------------------------------------------------|
|                                                 | Screening                  | Baseline/<br>enrolment | Post-allocation                                                           |                                      |                                                                                        | Close-<br>out                                      |
| Time point<br>(expected<br>duration of visit)   | -t <sub>1</sub>            | Day 0<br>Visit 1       | Weekly visits<br>Day<br>7,14,21,28,35,<br>42,49,56,63,70,77<br>Visit 2-12 | Midline<br>3rd+<br>month<br>Visit 13 | Monthly visits<br>(post-<br>intervention)<br>Month<br>4,5,6,7,8,9,10,11<br>Visit 14-20 | Endline<br>12 <sup>th</sup><br>+months<br>Visit 21 |
| Enrolment:                                      | Age<br>approx.<br>8±0.5 mo |                        |                                                                           |                                      |                                                                                        |                                                    |
| Eligibility screen<br>(20 min)                  | X                          |                        |                                                                           |                                      |                                                                                        |                                                    |
| Informed<br>consent (15<br>min)                 | X                          | X                      |                                                                           |                                      |                                                                                        |                                                    |
| Allocation                                      |                            | X                      |                                                                           |                                      |                                                                                        |                                                    |
| Interventions:                                  |                            | X                      | X                                                                         |                                      |                                                                                        |                                                    |
| Socio<br>demographic<br>information (15<br>min) |                            | X                      |                                                                           |                                      |                                                                                        |                                                    |
| Family Care<br>Indicators (15<br>min)           |                            | X                      |                                                                           | X                                    |                                                                                        | X                                                  |
| Temperament<br>questionnaire                    |                            | X                      |                                                                           | X                                    |                                                                                        | X                                                  |

|                                                |  |   |   |   |   |   |
|------------------------------------------------|--|---|---|---|---|---|
| (20 min)                                       |  |   |   |   |   |   |
| Food security questionnaire (15 min)           |  | X |   | X |   | X |
| Adherence and morbidity questionnaire (15 min) |  |   | X | X | X | X |
| Bayley-III (90-120 min)                        |  | X |   | X |   | X |
| Wolke's Behaviour Rating Scale (10 min)        |  | X |   | X |   | X |
| Anthropometry (5 min)                          |  | X |   | X |   | X |
| Adverse events reporting (AE, SAEs)            |  |   | X | X | X |   |
| Corneal lesions assessment                     |  |   |   | X |   |   |
| Venous blood collection (10 min)               |  | X |   | X |   | X |
| Willingness to pay questionnaire (10 min)      |  |   |   | X |   |   |

### Other visits

### Withdrawal visit

Children who stop study drug may continue with assessments if their guardian wishes. If a participant withdraws early or investigator terminates participation, we will seek to undertake the following assessments:

- Reason for study withdrawal
- If within 2 weeks of visit 13 or 21, we will invite the participant to attend to undertake this visit unless the reason for withdrawal precludes this.

Recruitment is expected to commence in July 2017 and the trial will be open for 18 months. Expected participant flow is shown in Figure 2.

### **Study oversight and adherence**

All staff will undergo specific training unique to their role in the study. Adherence will be monitored for all participants. VHWs will measure the amount of syrup and number of sachets unused, and it will be recorded on the case record forms of each child.

### **Outcomes**

#### *Primary outcome*

Cognitive Composite Score (CogCS) measured by Bayley Scales of Infant and Toddler Development (Bayley-III) after 3 months of intervention is the primary outcome.<sup>41</sup> Bayley-III is a validated index of child development and the preferred field assessment tool. It is a standard series of measurements primarily to assess cognitive, motor (fine and gross) and language (receptive and expressive) development of infants and toddlers aged 0-3 ½ yrs. Total number of credited items is converted into scaled scores based on child's age, which are then converted to composite scores of each subscale. These scores are used to determine the child's performance compared with norms taken from typically developing children of their age in developed countries. Bayley-II has been adapted and extensively used on Bangladeshi children.<sup>42-44</sup> Bayley-III has now been adapted, with some components not familiar for the rural and urban children of this country changed according to the local context. It has been used in several studies in this population.<sup>45</sup> Each tester will receive month long training for Bayley assessments after employment. Training will cover administration of the testing instruments across all age groups from 1 to 42 months. Refresher training will be provided every three months to maintain the consistency and agreements between testers. New testers hired during the course of the study will undergo the same training process. Bayley testers will be certified



1  
2  
3 and permitted to collect data only when their results agree >90% with the gold standard i.e. the  
4 trainer. About 5-10% of the tests by each tester will be observed by the trainer for inter-tester  
5 reliability over the course of the study.  
6  
7

### 8 9 10 *Secondary outcomes*

11 *Development:* CogCS at the end of 9 months post intervention, motor and language composite  
12 scores by Bayley-III, behaviour rating on selected items from Wolke's rating scales and BSID-II  
13 behaviour ratings, temperament by using a modified version of Bates, quality of home  
14 stimulation by using family care indicators, and food insecurity by household food insecurity  
15 access scale will be measured immediately after intervention and post intervention follow-up.<sup>46-</sup>  
16

17  
18  
19 <sup>49</sup> All the secondary outcomes will be assessed at 3-months (end of intervention) and 9-months  
20 post intervention.  
21  
22

23  
24 *Physical growth:* will be measured as length, weight, head circumference at end of intervention  
25 and post follow-up period. Length of the child will be measured to the nearest 0.1 cm by using  
26 the Shorr stadiometer (Shorr Products), which has been previously validated and used on local  
27 population. Weights will be obtained using a battery-powered digital scale (Tanita HD-318).  
28 Length and weight will be used to develop indicators of stunting and wasting compared to age-  
29 sex specific WHO international reference growth standards.<sup>50</sup> Measurements will be taken in  
30 duplicate with the average taken unless substantial discrepancy occurs. Physical growth is a  
31 secondary outcome of interest, but it can be a confounding factor because malnutrition is  
32 correlated to development. We will therefore treat physical growth as both an outcome and a  
33 confounder in our analysis. Testers will be certified to take anthropometric measurements only  
34 when they achieve a high inter-rater reliability with the trainer i.e. the gold standard. About 5-  
35 10% measures will be checked by the quality assurance team for inter-observer reliability  
36 throughout the study period. Presence of corneal lesions (caused by vitamin A deficiency) will  
37 be assessed by the field team at the midline visit.  
38  
39  
40  
41  
42  
43  
44  
45  
46  
47

48  
49 *Infectious morbidity:* as rate and number of days affected by diarrhea/ bloody diarrhea (along  
50 with number of episodes per day), respiratory infection, vomiting, and fever. Infectious morbidity  
51 data will be based on previous 7 days recall by caregivers during the 3 months of active  
52 intervention. During the subsequent 9 months post intervention follow-up visit morbidity data will  
53 be based on recall for the previous 2 weeks, except for hospitalization, which will cover previous  
54  
55  
56  
57  
58  
59  
60

1  
2  
3 month's recall. Morbidity information will be collected by VHWs during routine weekly or monthly  
4 visits by interviewing caregivers  
5  
6  
7

8 *Unplanned hospital or health-care facility attendance:* as rate, will be measured by field workers  
9 along with morbidity questionnaires. Cause specific attendance will also be ascertained by  
10 checking health care records by study physician.  
11  
12

13  
14 *Adherence to study medication:* measured by field workers' audit of packs or measuring the  
15 unused doses during weekly visits.  
16  
17  
18

19 *Economic data:* We will collect Willingness to Pay (WTP) data to predict the participant's interest  
20 and affordability to pay for the price of the intervention. Parent's perception of the benefits (or  
21 lack thereof) can also play an important role for uptake of the supplementation. Willingness to  
22 pay (WTP) will be measured through the contingent valuation method to predict the maximum  
23 price at or below which the participants will definitely buy one unit of the medicine at the end of  
24 intervention. Data for future health economic analyses will be collected along with unplanned  
25 clinic presentation and hospital admission.  
26  
27  
28  
29  
30  
31

32 *Blood samples:* 3mL of venous blood will be collected. Anaemia (Hb<11gm/dL), Iron Deficiency  
33 (Ferritin<12ng/uL) and Iron Deficiency Anaemia (Anaemia + Iron Deficiency) will be measured  
34 at baseline, at the end of intervention and at post intervention follow-up periods. Hemoglobin will  
35 be assessed by HemoCue 301 and Ferritin will be assessed by cobas c 311 analyzer. Surplus  
36 serum and whole blood will be stored for related subsequent studies.  
37  
38  
39  
40  
41

#### 42 **Sample size and power estimation**

43 The sample size calculation is based on the primary objective which will be evaluated using the  
44 estimated mean difference and 95% confidence interval (CI) in the change from baseline to 3  
45 months post-baseline of the Bayley III CogCS between the iron supplementation and placebo  
46 arm, and the MMPs and placebo arm. By construct, the Bayley III CogCS ranges between 55  
47 and 150 (standardised mean 100; standard deviation [SD] 15) whereby a higher Bayley III  
48 CogCS indicates a better cognitive performance. Our systematic review estimated a difference  
49 of 1.65 points (n=1093 across six trials; random-effects 95% CI [-0.63, 3.94]) on Bayley Mental  
50 Development Index (MDI) (the cognitive scale reported on previous versions of the Bayley  
51 scales) in favor of daily iron supplementation compared to control in children aged 4-23 months.  
52  
53  
54  
55  
56  
57  
58  
59  
60

1  
2  
3 Among the six studies included in this systematic review, the highest quality (Cochrane risk of  
4 bias tool) study (in Indonesia) evaluating effects on development in a community setting found a  
5 2-point difference of universal iron supplementation (n=136) compared to placebo (n=143) after  
6 6 months' intervention (mean Bayley MDI: iron 101 versus placebo 99, p=0.76).<sup>51</sup> A more recent  
7 (but non-blinded) trial in Pakistan found a significant 2.5-point difference of MMPs (n=658)  
8 compared to control (n=699) at 12 months of age (mean Bayley III CogCS: MMPs 95.9 versus  
9 placebo 93.4, p=0.007).<sup>27</sup> The sample size required to detect a 2-point difference is 883 per arm  
10 to reach 80% power using a two-sided 2.5% level of significance for each comparison  
11 (Bonferroni correction), assuming a 15-point SD. Accounting for about 20% missing data in  
12 Bayley III CogCS at 3 months post-baseline, based on a randomised trial in Bangladesh which  
13 reported a 26% loss between birth and 6 months<sup>43</sup>, the total sample size is 3300. This is  
14 currently the largest trial evaluating effects of iron compared to placebo on cognitive  
15 development ever to be conducted and will provide evidence for the overall, average effect of  
16 these interventions when applied universally to a population with a high prevalence of anaemia,  
17 as presently recommended by the World Health Organization.  
18  
19  
20  
21  
22  
23  
24  
25  
26  
27  
28

### 29 **Statistical analysis plan**

30 All randomised infants will be included in the analysis set according to the arm to which the  
31 infant was randomly allocated. Baseline characteristics will be examined across the arms to  
32 assess the randomization. Continuous data will be summarized using mean and SD or median  
33 and 25<sup>th</sup>-75<sup>th</sup> percentile if data are found to be skewed (e.g., ferritin). Categorical data will be  
34 presented as count and percentage. The primary outcome, Bayley-III CogCS scores at  
35 baseline, 3 month, and 12 month post-baseline, will be analysed using a constrained  
36 longitudinal data analysis method.<sup>52</sup> The model will incorporate time point as a categorical  
37 variable and assume a common baseline mean across the three arms. Furthermore, it will  
38 adjust for the stratification factors used in the randomisation (gender, union) as main factors and  
39 model the variance-covariance among the repeated measurements as unstructured. The  
40 estimate and 95% CI of the mean difference in change from baseline to each post-baseline time  
41 point between two arms will be obtained from this model. This model will yield unbiased results  
42 when the outcome data are missing at random. In addition, sensitivity analyses consisting of an  
43 adjusted analysis accounting for key prognostic baseline variables (e.g., socio-economic status)  
44 will be conducted. Secondary continuous outcomes (e.g., Bayley III domain scores,  
45 anthropometry, z-scores [growth], behavior rating scale) will be analysed similarly as the  
46 primary outcome. Appropriate transformations may be applied to the variables before fitting the  
47  
48  
49  
50  
51  
52  
53  
54  
55  
56  
57  
58  
59  
60

1  
2  
3 model if considered skewed. Secondary binary outcomes (e.g., growth stunting, wasting, and  
4 underweight) will be analysed using generalized estimating equations with a logarithmic link  
5 function and unstructured correlation. A Poisson regression, or in case of over-dispersion  
6 negative binomial regression, will be used to analyse the rate of infections (e.g., fever) for the  
7 duration of the intervention period, the follow-up period, and 12-month study period. The  
8 number and percentage of infants with at least one infection, at least one AE, and at least one  
9 unplanned hospital or health-care facility attendance will be tabulated by arm for the duration of  
10 the intervention period, the follow-up period, and 12-month study period. A per-protocol  
11 analysis of efficacy outcomes, based on adherence, and as as-treated analysis of safety  
12 outcomes, in case of misrandomisation, will also be conducted. Exploratory subgroup analyses  
13 will be performed irrespective of the primary study findings by a) baseline anemia status (yes vs  
14 no anemia), b) baseline iron deficiency status (yes vs no iron deficient), c) baseline iron  
15 deficiency anemia status (yes vs no iron deficient anemia) d) baseline home stimulation (above  
16 vs below median level as measured by family care indicators) e) wealth status (above or below  
17 median), f) growth (presence or absence of stunting), g) infant's sex (male vs female), and h)  
18 food security status, by adding subgroup as a main effect and its interaction with treatment arm  
19 to the model to evaluate if the treatment effect differs across subgroup categories. We postulate  
20 that infants with anemia, iron deficiency, iron deficiency anemia, or above median home  
21 stimulation will have a larger treatment effect compared to those whom are non-anaemic, non-  
22 iron deficient, non-iron deficient anaemic, or below median home stimulation respectively.  
23  
24  
25  
26  
27  
28  
29  
30  
31  
32  
33  
34  
35

36  
37 In addition, depending on the findings of the study, we will undertake subsequent health  
38 economics analysis of the data. For this purpose, we will collect and present all direct and  
39 indirect costs for the implementation of the project. The contingent valuation methods will be  
40 used to estimate weekly WTP and multiple regression analysis will be used to predict WTP by  
41 socioeconomic characters, past illness and type of medicine.  
42  
43  
44  
45  
46

### 47 **Data management**

48 Data from questionnaires will be entered directly into electronic tablets in the field, along with  
49 GPS location data. Data will be checked in real time for quality by a dedicated data manager.  
50 Data for Bayley scales will be entered subsequently, with 10% undergoing double entry. Range  
51 checks will be applied automatically to all data. All aspects of the trial conduct (field work eg  
52 ethical recruitment and consent, randomisation, provision of interventions, outcome  
53  
54  
55  
56  
57  
58  
59  
60

1  
2  
3 assessments, data collection and entry) will be audited at least annually by investigators from  
4 the University of Melbourne.  
5  
6  
7

### 8 **ETHICS AND DISSEMINATION:**

9  
10 A placebo controlled trial is essential to establish the efficacy and adverse effects of iron on  
11 children's health and development, and is considered ethically justifiable because: 1) there is  
12 uncertainty regarding the benefits of iron supplementation on cognitive function, 2) all families  
13 will be educated about iron nutrition, 3) children with anaemia at the final measurement (+12m)  
14 will be referred to health centres, 4) there is previous experience of use of placebo arm in large  
15 iron/MMP RCTs e.g. in Tanzania, Ghana, Nepal and many other countries, and 5) mild-  
16 moderate iron deficiency is not yet known to cause, and iron interventions to alleviate, moderate  
17 or severe, permanent cognitive delay. Even though universal supplementation is recommended  
18 by WHO, it is not yet practiced in Bangladesh.  
19  
20  
21  
22  
23  
24  
25

26 The trial has been approved by the Melbourne Health Human Research Ethics Committee,  
27 Australia (2016.269); the Ethical Review Committee of icddr,b (PR-16063); and the Directorate  
28 General of Drug Administration, Ministry of Health and Family Welfare, Bangladesh. Informed  
29 written consent will be obtained from parents/guardians prior to both screening and enrollment  
30 procedures – either via signature or a thumbprint or mark for those who cannot sign. Written  
31 informed consent from the child's parent or legal guardian will be obtained by the SFA, the most  
32 senior member of the field data collection teams. Consent will encompass participation in the  
33 trial and its procedures, as well as storage and possible use of samples for related studies in the  
34 future; this includes non-diagnostic molecular and genetic studies. Children ineligible at  
35 recruitment due to illness will be referred for clinical care. Any information obtained in  
36 connection with this research project or in any publication and/or presentation, will be provided  
37 in such a way that the individual cannot be identified. Only researchers on this project will have  
38 access to the data. Three years after the protocol completion date icddr,b research data in the  
39 repository will be made publicly available according to icddr,b data access policy.  
40  
41  
42  
43  
44  
45  
46  
47  
48  
49

### 50 **Data Monitoring**

51  
52 An independent Data Safety Monitoring Board (DSMB) has been constituted and will provide  
53 oversight of the study. In cases of serious adverse events, the study physician will follow-up and  
54 document the course of events, will recommend for necessary suspension, refer if necessary  
55 and report to DSMB. As per best practice, the DSMB will define their meeting schedule and plan  
56  
57  
58  
59  
60

1  
2  
3 for interim analyses and define stopping rules in the DSMB charter. Amendments to the trial  
4 protocol will be updated in the trial protocol, the trial registration, informed by memo to all  
5 investigators as well as the ethical review committees, and if significant, will be explained in the  
6 final publications of the trial.  
7  
8  
9  
10  
11  
12  
13  
14  
15  
16  
17  
18  
19  
20  
21  
22  
23  
24  
25  
26  
27  
28  
29  
30  
31  
32  
33  
34  
35  
36  
37  
38  
39  
40  
41  
42  
43  
44  
45  
46  
47  
48  
49  
50  
51  
52  
53  
54  
55  
56  
57  
58  
59  
60

For peer review only

## Discussion

Understanding the benefits and risks of universal iron interventions in young children at the population level is a public health priority. This pivotal trial will form the platform for global anaemia control policy in young children. It will define global guidelines, inform policymakers at the national and regional level, and provide the economic rationale for donors and governments to select and fund anaemia control interventions. The design (combining interventions with vaccination) will enable translation to the field. Results will be communicated to the academic community through publication in peer-reviewed journals. Criteria for authorship will reflect ICMJE guidelines. We will also communicate results to policy makers through policy-briefs and reports e.g. WHO, UNICEF, and major nutrition bodies (e.g. GAIN).

**Author contributions:** SP and BB conceived of the idea for the trial. SP, BB, MD, JF, SGM, JS, SA, JH prepared the initial funding submissions and proposals. MIH, SJH, SB, JH, SP and BB prepared the detailed trial protocol. SB and JAS developed the statistical analysis plan. MOH, SJH, FT and JH designed the field work. MIH, SJH and SP wrote the first draft of the manuscript, and all authors have reviewed and authorized it.

**Funding statement:** The BRISC trial is being implemented by icddr,b in collaboration with University of Melbourne and funded by NHMRC, grant number 1103262. SP is funded by a CJ Martin NHMRC Fellowship. The trial is investigator initiated and sponsored, the trial sponsor will be the University of Melbourne.

**Competing interest statement:** The investigators have no financial or other conflicts of interest to declare.

**Provenance and peer review:** Not commissioned, externally peer reviewed.



**References:**

1. Stevens GA, Finucane MM, De-Regil LM, et al. Global, regional, and national trends in haemoglobin concentration and prevalence of total and severe anaemia in children and pregnant and non-pregnant women for 1995-2011: a systematic analysis of population-representative data. *Lancet Glob Health*. 2013;1(1):e16-e25.
2. Pasricha SR, Black J, Muthayya S, et al. Determinants of anemia among young children in rural India. *Pediatrics*. 2010;126(1):e140-149.
3. Tofail F. Prevalence of iron deficiency anaemia among young children in rural Bangladesh. *Health and Science Bulletin*. 2010;8(2):1-6.
4. Pasricha SR, Atkinson SH, Armitage AE, et al. Expression of the iron hormone hepcidin distinguishes different types of anemia in African children. *Science translational medicine*. 2014;6(235):235re233.
5. Pasricha SR, Flecknoe-Brown SC, Allen KJ, et al. Diagnosis and management of iron deficiency anaemia: a clinical update. *Med J Aust*. 2010;193(9):525-532.
6. WHO. Daily iron supplementation in children 6-23 months of age. *e-Library of Evidence for Nutrition Actions (eLENA)* 2016; [http://www.who.int/elena/titles/guidance\\_summaries/iron\\_children/en/](http://www.who.int/elena/titles/guidance_summaries/iron_children/en/). Accessed July 11th, 2016.
7. WHO. WHO guideline: Use of multiple micronutrient powders for point-of-use fortification of foods consumed by infants and young children aged 6–23 months and children aged 2–12 years. Geneva: World Health Organization; 2016.
8. World Health Organization. *The global prevalence of anaemia in 2011*. Geneva: World Health Organization; 2015.
9. Black RE, Allen LH, Bhutta ZA, et al. Maternal and child undernutrition: global and regional exposures and health consequences. *Lancet*. 2008;371(9608):243-260.
10. Pasricha SR. Anemia: a comprehensive global estimate. *Blood*. 2014;123(5):611-612.
11. Pasricha SR, Drakesmith H, Black J, Hipgrave D, Biggs BA. Control of iron deficiency anemia in low and middle-income countries. *Blood*. 2013.
12. Kassebaum NJ, Jasrasaria R, Naghavi M, et al. A systematic analysis of global anemia burden from 1990 to 2010. *Blood*. 2013.
13. Beard J. Recent evidence from human and animal studies regarding iron status and infant development. *J Nutr*. 2007;137(2):524S-530S.
14. Beard JL. Why iron deficiency is important in infant development. *J Nutr*. 2008;138(12):2534-2536.
15. McCann JC, Ames BN. An overview of evidence for a causal relation between iron deficiency during development and deficits in cognitive or behavioral function. *The American journal of clinical nutrition*. 2007;85(4):931-945.
16. Walker SP, Wachs TD, Gardner JM, et al. Child development: risk factors for adverse outcomes in developing countries. *Lancet*. 2007;369(9556):145-157.
17. Low M, Farrell A, Biggs BA, Pasricha SR. Effects of daily iron supplementation in primary-school-aged children: systematic review and meta-analysis of randomized controlled trials. *CMAJ : Canadian Medical Association journal = journal de l'Association medicale canadienne*. 2013.
18. Pasricha S-R, Hayes E, Kalumba K, Biggs B-A. Effect of daily iron supplementation on health in children aged 4–23 months: a systematic review and meta-analysis of randomised controlled trials. *Lancet Glob Health*. 2013;1(2):e77 - e86.
19. Thompson J, Biggs BA, Pasricha SR. Effects of Daily Iron Supplementation in 2- to 5-Year-Old Children: Systematic Review and Meta-analysis. *Pediatrics*. 2013.



- 1
- 2
- 3
- 4 20. De-Regil LM, Suchdev PS, Vist GE, Walleser S, Peña-Rosas JP. Home fortification of foods with
- 5 multiple micronutrient powders for health and nutrition in children under two years of age.
- 6 *Cochrane Database Syst Rev.* 2011;9:CD008959.
- 7 21. Sachdev H, Gera T, Nestel P. Effect of iron supplementation on mental and motor development
- 8 in children: systematic review of randomised controlled trials. *Public health nutrition.*
- 9 2005;8(2):117-132.
- 10 22. Szajewska H, Rusczyński M, Chmielewska A. Effects of iron supplementation in nonanemic
- 11 pregnant women, infants, and young children on the mental performance and psychomotor
- 12 development of children: a systematic review of randomized controlled trials. *The American*
- 13 *journal of clinical nutrition.* 2010;91(6):1684-1690.
- 14 23. Wang B, Zhan S, Gong T, Lee L. Iron therapy for improving psychomotor development and
- 15 cognitive function in children under the age of three with iron deficiency anaemia. *Cochrane*
- 16 *Database Syst Rev.* 2013;6:CD001444.
- 17 24. Horton S, Ross J. The economics of iron deficiency. *Food Policy.* 2003;28:51-75.
- 18 25. Larson LM, Yousafzai AK. A meta-analysis of nutrition interventions on mental development of
- 19 children under-two in low- and middle-income countries. *Matern Child Nutr.* 2017;13(1).
- 20 26. De-Regil LM, Suchdev PS, Vist GE, Walleser S, Pena-Rosas JP. Home fortification of foods with
- 21 multiple micronutrient powders for health and nutrition in children under two years of age.
- 22 *Cochrane database of systematic reviews.* 2011;9:CD008959.
- 23 27. Yousafzai AK, Rasheed MA, Rizvi A, Armstrong R, Bhutta ZA. Effect of integrated responsive
- 24 stimulation and nutrition interventions in the Lady Health Worker programme in Pakistan on
- 25 child development, growth, and health outcomes: a cluster-randomised factorial effectiveness
- 26 trial. *Lancet.* 2014;384(9950):1282-1293.
- 27 28. Yousafzai AK, Obradovic J, Rasheed MA, et al. Effects of responsive stimulation and nutrition
- 28 interventions on children's development and growth at age 4 years in a disadvantaged
- 29 population in Pakistan: a longitudinal follow-up of a cluster-randomised factorial effectiveness
- 30 trial. *Lancet Glob Health.* 2016;4(8):e548-558.
- 31 29. Pongcharoen T, DiGirolamo AM, Ramakrishnan U, Winichagoon P, Flores R, Martorell R. Long-
- 32 term effects of iron and zinc supplementation during infancy on cognitive function at 9 y of age
- 33 in northeast Thai children: a follow-up study. *The American journal of clinical nutrition.*
- 34 2011;93(3):636-643.
- 35 30. Christian P, Morgan ME, Murray-Kolb L, et al. Preschool iron-folic acid and zinc supplementation
- 36 in children exposed to iron-folic acid in utero confers no added cognitive benefit in early school-
- 37 age. *The Journal of nutrition.* 2011;141(11):2042-2048.
- 38 31. WHO/UNICEF/UNU. *Iron Deficiency Anaemia: Assessment, Prevention, and Control. A guide for*
- 39 *programme managers.* Geneva: World Health Organization; 2001.
- 40 32. Sachdev H, Gera T, Nestel P. Effect of iron supplementation on physical growth in children:
- 41 systematic review of randomised controlled trials. *Public health nutrition.* 2006;9(7):904-920.
- 42 33. Sazawal S, Black RE, Ramsan M, et al. Effects of routine prophylactic supplementation with iron
- 43 and folic acid on admission to hospital and mortality in preschool children in a high malaria
- 44 transmission setting: community-based, randomised, placebo-controlled trial. *Lancet.*
- 45 2006;367(9505):133-143.
- 46 34. Soofi S, Cousens S, Iqbal SP, et al. Effect of provision of daily zinc and iron with several
- 47 micronutrients on growth and morbidity among young children in Pakistan: a cluster-
- 48 randomised trial. *Lancet.* 2013.
- 49 35. Zlotkin S, Newton S, Aimone AM, et al. Effect of iron fortification on malaria incidence in infants
- 50 and young children in Ghana: a randomized trial. *JAMA.* 2013;310(9):938-947.
- 51
- 52
- 53
- 54
- 55
- 56
- 57
- 58
- 59
- 60

- 1
- 2
- 3
- 4 36. National Institute of Population Research and Training (NIPORT) MaA all. Bangladesh -
- 5 Demographic and Health Survey 2011. Dhaka, Bangladesh and Calverton, Maryland, USA:
- 6 NIPORT, Mitra and Associates, and ICF International. 2013.
- 7
- 8 37. Haque U, Overgaard HJ, Clements AC, et al. Malaria burden and control in Bangladesh and
- 9 prospects for elimination: an epidemiological and economic assessment. *The Lancet Global*
- 10 *Health*. 2014;2(2):e98-e105.
- 11
- 12 38. Kinniburgh D, Smedley P. Arsenic contamination of groundwater in Bangladesh. 2001.
- 13
- 14 39. WHO Guidelines Approved by the Guidelines Review Committee. *Guideline: Use of Multiple*
- 15 *Micronutrient Powders for Home Fortification of Foods Consumed by Infants and Children 6-23*
- 16 *Months of Age*. Geneva: World Health Organization; Copyright (c) World Health Organization
- 17 2011.; 2011.
- 18
- 19 40. WHO Guidelines Approved by the Guidelines Review Committee. *Guideline: Daily Iron*
- 20 *Supplementation in Infants and Children*. Geneva: World Health Organization; Copyright (c)
- 21 World Health Organization 2016.; 2016.
- 22
- 23 41. Bayley N. *Bayley Scales of Infant and Toddler Development: Motor Scale*. Psychological
- 24 Corporation; 2006.
- 25
- 26 42. Hamadani JD, Baker-Henningham H, Tofail F, Mehrin F, Huda SN, Grantham-McGregor SM.
- 27 Validity and reliability of mothers' reports of language development in 1-year-old children in a
- 28 large-scale survey in Bangladesh. *Food and nutrition bulletin*. 2010;31(2\_suppl2):S198-S206.
- 29
- 30 43. Tofail F, Persson LÅ, El Arifeen S, et al. Effects of prenatal food and micronutrient
- 31 supplementation on infant development: a randomized trial from the Maternal and Infant
- 32 Nutrition Interventions, Matlab (MINIMat) study. *The American journal of clinical nutrition*.
- 33 2008;87(3):704-711.
- 34
- 35 44. Parveen M, Rahman ST, Islam S, Zaman SS, Hamadani J, Khan NZ. Adaptation of items of bayley
- 36 scales of infant development-II (BSID-II) suitable for Bangladeshi infants. *Dhaka University*
- 37 *Journal of Biological Sciences*. 2014;23(2):187-195.
- 38
- 39 45. Jiang NM, Tofail F, Moonah SN, et al. Febrile illness and pro-inflammatory cytokines are
- 40 associated with lower neurodevelopmental scores in Bangladeshi infants living in poverty. *BMC*
- 41 *pediatrics*. 2014;14(1):50.
- 42
- 43 46. Wolke D, Skuse D, Mathisen B. Behavioral style in failure-to-thrive infants: a preliminary
- 44 communication. *Journal of Pediatric Psychology*. 1990;15(2):237-254.
- 45
- 46 47. Bayley N. Manual for the Bayley Scales of Infant Development II. *San Antonio, TX: The*
- 47 *Psychological Corporation*. 1993.
- 48
- 49 48. Coates J, Swindale A, Bilinsky P. Household Food Insecurity Access Scale (HFIAS) for
- 50 Measurement of Food Access: Indicator Guide v. 3. 2007. *Washington, DC: Food and Nutrition*
- 51 *Technical Assistance Project (FANTA), Academy for Educational Development, Google Scholar*.
- 52
- 53 49. Hamadani JD, Tofail F, Hilaly A, Huda SN, Engle P, Grantham-McGregor SM. Use of family care
- 54 indicators and their relationship with child development in Bangladesh. *Journal of Health,*
- 55 *Population and Nutrition*. 2010:23-33.
- 56
- 57 50. Organization WH. *WHO child growth standards: length/height for age, weight-for-age, weight-*
- 58 *for-length, weight-for-height and body mass index-for-age, methods and development*. World
- 59 Health Organization; 2006.
- 60
51. Lind T, Lonnerdal B, Stenlund H, et al. A community-based randomized controlled trial of iron
- and zinc supplementation in Indonesian infants: effects on growth and development. *The*
- American journal of clinical nutrition*. 2004;80(3):729-736.
52. Ward DG, Roberts K, Stonelake P, et al. SELDI-TOF-MS determination of hepcidin in clinical
- samples using stable isotope labelled hepcidin as an internal standard. *Proteome Sci*. 2008;6:28.

1  
2  
3  
4  
5  
6  
7  
8  
9  
10  
11  
12  
13  
14  
15  
16  
17  
18  
19  
20  
21  
22  
23  
24  
25  
26  
27  
28  
29  
30  
31  
32  
33  
34  
35  
36  
37  
38  
39  
40  
41  
42  
43  
44  
45  
46  
47  
48  
49  
50  
51  
52  
53  
54  
55  
56  
57  
58  
59  
60

For peer review only

1  
2  
3 **Figure 1: Trial Design**  
4  
5  
6  
7  
8  
9  
10  
11  
12  
13  
14  
15  
16  
17  
18  
19  
20  
21  
22  
23  
24  
25  
26  
27  
28  
29  
30  
31  
32  
33  
34  
35  
36  
37  
38  
39  
40  
41  
42  
43  
44  
45  
46  
47  
48  
49  
50  
51  
52  
53  
54  
55  
56  
57  
58  
59  
60

For peer review only

1  
2  
3  
4  
5  
6  
7  
8  
9  
10  
11  
12  
13  
14  
15  
16  
17  
18  
19  
20  
21  
22  
23  
24  
25  
26  
27  
28  
29  
30  
31  
32  
33  
34  
35  
36  
37  
38  
39  
40  
41  
42  
43  
44  
45  
46  
47  
48  
49  
50  
51  
52  
53  
54  
55  
56  
57  
58  
59  
60

Figure 2: CONSORT Flow Diagram for the BRISC Trial

For peer review only

1  
2  
3  
4  
5  
6  
7  
8  
9  
10  
11  
12  
13  
14  
15  
16  
17  
18  
19  
20  
21  
22  
23  
24  
25  
26  
27  
28  
29  
30  
31  
32  
33  
34  
35  
36  
37  
38  
39  
40  
41  
42  
43  
44  
45  
46  
47  
48  
49  
50  
51  
52  
53  
54  
55  
56  
57  
58  
59  
60

For peer review only

1  
2  
3  
4  
5  
6  
7  
8  
9  
10  
11  
12  
13  
14  
15  
16  
17  
18  
19  
20  
21  
22  
23  
24  
25  
26  
27  
28  
29  
30  
31  
32  
33  
34  
35  
36  
37  
38  
39  
40  
41  
42  
43  
44  
45  
46  
47  
48  
49  
50  
51  
52  
53  
54  
55  
56  
57  
58  
59  
60

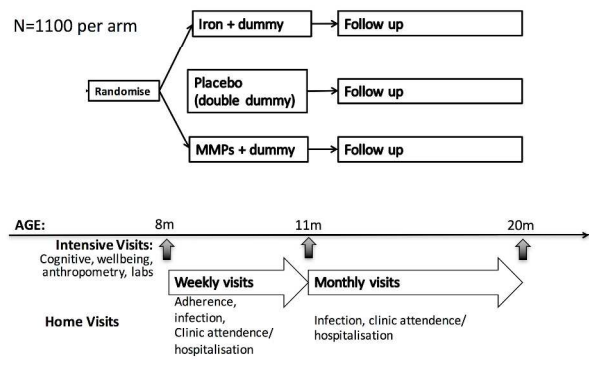

Figure 1: Trial Design

338x190mm (300 x 300 DPI)

review only

1  
2  
3  
4  
5  
6  
7  
8  
9  
10  
11  
12  
13  
14  
15  
16  
17  
18  
19  
20  
21  
22  
23  
24  
25  
26  
27  
28  
29  
30  
31  
32  
33  
34  
35  
36  
37  
38  
39  
40  
41  
42  
43  
44  
45  
46  
47  
48  
49  
50  
51  
52  
53  
54  
55  
56  
57  
58  
59  
60

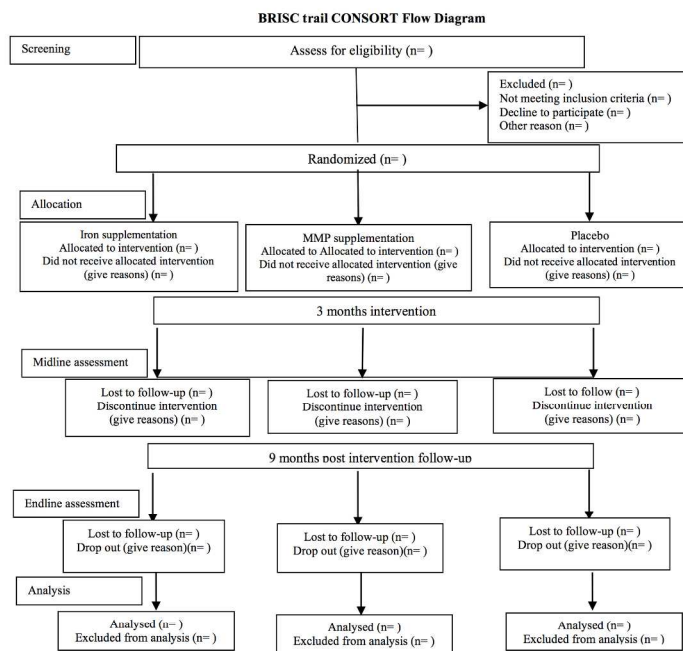

28

Figure 2: CONSORT Flow Diagram for the BRISC Trial

215x279mm (300 x 300 DPI)



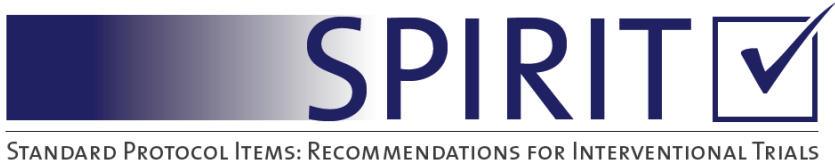

1  
2  
3  
4  
5  
6  
7  
8  
9  
10  
11  
12  
13  
14  
15  
16  
17  
18  
19  
20  
21  
22  
23  
24  
25  
26  
27  
28  
29  
30  
31  
32  
33  
34  
35  
36  
37  
38  
39  
40  
41  
42  
43  
44  
45  
46  
47

SPIRIT 2013 Checklist: Recommended items to address in a clinical trial protocol and related documents\*

| Section/item                      | Item No | Description                                                                                                                                                                                                                                                                              | Addressed on page number |
|-----------------------------------|---------|------------------------------------------------------------------------------------------------------------------------------------------------------------------------------------------------------------------------------------------------------------------------------------------|--------------------------|
| <b>Administrative information</b> |         |                                                                                                                                                                                                                                                                                          |                          |
| Title                             | 1       | Descriptive title identifying the study design, population, interventions, and, if applicable, trial acronym                                                                                                                                                                             | _1_____                  |
| Trial registration                | 2a      | Trial identifier and registry name. If not yet registered, name of intended registry                                                                                                                                                                                                     | _3_____                  |
|                                   | 2b      | All items from the World Health Organization Trial Registration Data Set                                                                                                                                                                                                                 | _3_____                  |
| Protocol version                  | 3       | Date and version identifier                                                                                                                                                                                                                                                              | _3_____                  |
| Funding                           | 4       | Sources and types of financial, material, and other support                                                                                                                                                                                                                              | _17_____                 |
| Roles and responsibilities        | 5a      | Names, affiliations, and roles of protocol contributors                                                                                                                                                                                                                                  | _1, 17_____              |
|                                   | 5b      | Name and contact information for the trial sponsor                                                                                                                                                                                                                                       | _1, 17_____              |
|                                   | 5c      | Role of study sponsor and funders, if any, in study design; collection, management, analysis, and interpretation of data; writing of the report; and the decision to submit the report for publication, including whether they will have ultimate authority over any of these activities | _N/A_____                |
|                                   | 5d      | Composition, roles, and responsibilities of the coordinating centre, steering committee, endpoint adjudication committee, data management team, and other individuals or groups overseeing the trial, if applicable (see Item 21a for data monitoring committee)                         | _N/A_____                |

1 **Introduction**

2

3 Background and 6a Description of research question and justification for undertaking the trial, including summary of relevant \_\_\_ 4 \_\_\_  
 4 rationale studies (published and unpublished) examining benefits and harms for each intervention  
 5

6 6b Explanation for choice of comparators \_\_\_ 4-6 \_\_\_  
 7

8 Objectives 7 Specific objectives or hypotheses \_\_\_ 7 \_\_\_  
 9

10 Trial design 8 Description of trial design including type of trial (eg, parallel group, crossover, factorial, single group),  
 11 allocation ratio, and framework (eg, superiority, equivalence, noninferiority, exploratory) \_\_\_ 7 \_\_\_  
 12  
 13

14 **Methods: Participants, interventions, and outcomes**

15

16 Study setting 9 Description of study settings (eg, community clinic, academic hospital) and list of countries where data will \_\_\_ 7 \_\_\_  
 17 be collected. Reference to where list of study sites can be obtained  
 18

19 Eligibility criteria 10 Inclusion and exclusion criteria for participants. If applicable, eligibility criteria for study centres and \_\_\_ 8 \_\_\_  
 20 individuals who will perform the interventions (eg, surgeons, psychotherapists)  
 21

22 Interventions 11a Interventions for each group with sufficient detail to allow replication, including how and when they will be \_\_\_ 8 \_\_\_  
 23 administered  
 24

25 11b Criteria for discontinuing or modifying allocated interventions for a given trial participant (eg, drug dose \_\_\_ NA \_\_\_  
 26 change in response to harms, participant request, or improving/worsening disease)  
 27

28 11c Strategies to improve adherence to intervention protocols, and any procedures for monitoring adherence \_\_\_ 8 \_\_\_  
 29 (eg, drug tablet return, laboratory tests)  
 30

31 11d Relevant concomitant care and interventions that are permitted or prohibited during the trial \_\_\_ 8 \_\_\_  
 32

33 Outcomes 12 Primary, secondary, and other outcomes, including the specific measurement variable (eg, systolic blood  
 34 pressure), analysis metric (eg, change from baseline, final value, time to event), method of aggregation (eg, \_\_\_ 12 \_\_\_  
 35 median, proportion), and time point for each outcome. Explanation of the clinical relevance of chosen  
 36 efficacy and harm outcomes is strongly recommended  
 37

38 Participant timeline 13 Time schedule of enrolment, interventions (including any run-ins and washouts), assessments, and visits for \_\_\_ 12 \_\_\_  
 39 participants. A schematic diagram is highly recommended (see Figure)  
 40  
 41  
 42  
 43

1 Sample size 14 Estimated number of participants needed to achieve study objectives and how it was determined, including clinical and statistical assumptions supporting any sample size calculations \_\_\_ 14 \_\_\_

4 Recruitment 15 Strategies for achieving adequate participant enrolment to reach target sample size \_\_\_ 14 \_\_\_

7 **Methods: Assignment of interventions (for controlled trials)**

9 Allocation:

11 Sequence generation 16a Method of generating the allocation sequence (eg, computer-generated random numbers), and list of any factors for stratification. To reduce predictability of a random sequence, details of any planned restriction (eg, blocking) should be provided in a separate document that is unavailable to those who enrol participants or assign interventions \_\_\_ 9 \_\_\_

17 Allocation concealment mechanism 16b Mechanism of implementing the allocation sequence (eg, central telephone; sequentially numbered, opaque, sealed envelopes), describing any steps to conceal the sequence until interventions are assigned \_\_\_ 9 \_\_\_

21 Implementation 16c Who will generate the allocation sequence, who will enrol participants, and who will assign participants to interventions \_\_\_ 9 \_\_\_

25 Blinding (masking) 17a Who will be blinded after assignment to interventions (eg, trial participants, care providers, outcome assessors, data analysts), and how \_\_\_ 9 \_\_\_

28 17b If blinded, circumstances under which unblinding is permissible, and procedure for revealing a participant's allocated intervention during the trial \_\_\_ 9 \_\_\_

32 **Methods: Data collection, management, and analysis**

34 Data collection methods 18a Plans for assessment and collection of outcome, baseline, and other trial data, including any related processes to promote data quality (eg, duplicate measurements, training of assessors) and a description of study instruments (eg, questionnaires, laboratory tests) along with their reliability and validity, if known. Reference to where data collection forms can be found, if not in the protocol \_\_\_ 9 \_\_\_

40 18b Plans to promote participant retention and complete follow-up, including list of any outcome data to be collected for participants who discontinue or deviate from intervention protocols \_\_\_ 9 \_\_\_

|    |                                 |     |                                                                                                                                                                                                                                                                                                                                       |        |
|----|---------------------------------|-----|---------------------------------------------------------------------------------------------------------------------------------------------------------------------------------------------------------------------------------------------------------------------------------------------------------------------------------------|--------|
| 1  | Data management                 | 19  | Plans for data entry, coding, security, and storage, including any related processes to promote data quality (eg, double data entry; range checks for data values). Reference to where details of data management procedures can be found, if not in the protocol                                                                     | __16__ |
| 2  |                                 |     |                                                                                                                                                                                                                                                                                                                                       |        |
| 3  |                                 |     |                                                                                                                                                                                                                                                                                                                                       |        |
| 4  |                                 |     |                                                                                                                                                                                                                                                                                                                                       |        |
| 5  | Statistical methods             | 20a | Statistical methods for analysing primary and secondary outcomes. Reference to where other details of the statistical analysis plan can be found, if not in the protocol                                                                                                                                                              | _14__  |
| 6  |                                 |     |                                                                                                                                                                                                                                                                                                                                       |        |
| 7  |                                 |     |                                                                                                                                                                                                                                                                                                                                       |        |
| 8  |                                 | 20b | Methods for any additional analyses (eg, subgroup and adjusted analyses)                                                                                                                                                                                                                                                              | _14__  |
| 9  |                                 |     |                                                                                                                                                                                                                                                                                                                                       |        |
| 10 |                                 | 20c | Definition of analysis population relating to protocol non-adherence (eg, as randomised analysis), and any statistical methods to handle missing data (eg, multiple imputation)                                                                                                                                                       | _14__  |
| 11 |                                 |     |                                                                                                                                                                                                                                                                                                                                       |        |
| 12 |                                 |     |                                                                                                                                                                                                                                                                                                                                       |        |
| 13 |                                 |     |                                                                                                                                                                                                                                                                                                                                       |        |
| 14 |                                 |     |                                                                                                                                                                                                                                                                                                                                       |        |
| 15 | <b>Methods: Monitoring</b>      |     |                                                                                                                                                                                                                                                                                                                                       |        |
| 16 |                                 |     |                                                                                                                                                                                                                                                                                                                                       |        |
| 17 | Data monitoring                 | 21a | Composition of data monitoring committee (DMC); summary of its role and reporting structure; statement of whether it is independent from the sponsor and competing interests; and reference to where further details about its charter can be found, if not in the protocol. Alternatively, an explanation of why a DMC is not needed | __16__ |
| 18 |                                 |     |                                                                                                                                                                                                                                                                                                                                       |        |
| 19 |                                 |     |                                                                                                                                                                                                                                                                                                                                       |        |
| 20 |                                 |     |                                                                                                                                                                                                                                                                                                                                       |        |
| 21 |                                 |     |                                                                                                                                                                                                                                                                                                                                       |        |
| 22 |                                 | 21b | Description of any interim analyses and stopping guidelines, including who will have access to these interim results and make the final decision to terminate the trial                                                                                                                                                               | _16__  |
| 23 |                                 |     |                                                                                                                                                                                                                                                                                                                                       |        |
| 24 |                                 |     |                                                                                                                                                                                                                                                                                                                                       |        |
| 25 |                                 |     |                                                                                                                                                                                                                                                                                                                                       |        |
| 26 | Harms                           | 22  | Plans for collecting, assessing, reporting, and managing solicited and spontaneously reported adverse events and other unintended effects of trial interventions or trial conduct                                                                                                                                                     | _12__  |
| 27 |                                 |     |                                                                                                                                                                                                                                                                                                                                       |        |
| 28 |                                 |     |                                                                                                                                                                                                                                                                                                                                       |        |
| 29 | Auditing                        | 23  | Frequency and procedures for auditing trial conduct, if any, and whether the process will be independent from investigators and the sponsor                                                                                                                                                                                           | _16__  |
| 30 |                                 |     |                                                                                                                                                                                                                                                                                                                                       |        |
| 31 |                                 |     |                                                                                                                                                                                                                                                                                                                                       |        |
| 32 |                                 |     |                                                                                                                                                                                                                                                                                                                                       |        |
| 33 | <b>Ethics and dissemination</b> |     |                                                                                                                                                                                                                                                                                                                                       |        |
| 34 |                                 |     |                                                                                                                                                                                                                                                                                                                                       |        |
| 35 | Research ethics approval        | 24  | Plans for seeking research ethics committee/institutional review board (REC/IRB) approval                                                                                                                                                                                                                                             | __16__ |
| 36 |                                 |     |                                                                                                                                                                                                                                                                                                                                       |        |
| 37 |                                 |     |                                                                                                                                                                                                                                                                                                                                       |        |
| 38 | Protocol amendments             | 25  | Plans for communicating important protocol modifications (eg, changes to eligibility criteria, outcomes, analyses) to relevant parties (eg, investigators, REC/IRBs, trial participants, trial registries, journals, regulators)                                                                                                      | __17__ |
| 39 |                                 |     |                                                                                                                                                                                                                                                                                                                                       |        |
| 40 |                                 |     |                                                                                                                                                                                                                                                                                                                                       |        |
| 41 |                                 |     |                                                                                                                                                                                                                                                                                                                                       |        |
| 42 |                                 |     |                                                                                                                                                                                                                                                                                                                                       |        |
| 43 |                                 |     |                                                                                                                                                                                                                                                                                                                                       |        |
| 44 |                                 |     |                                                                                                                                                                                                                                                                                                                                       |        |
| 45 |                                 |     |                                                                                                                                                                                                                                                                                                                                       |        |
| 46 |                                 |     |                                                                                                                                                                                                                                                                                                                                       |        |
| 47 |                                 |     |                                                                                                                                                                                                                                                                                                                                       |        |

|    |                               |     |                                                                                                                                                                                                                                                                                     |                               |
|----|-------------------------------|-----|-------------------------------------------------------------------------------------------------------------------------------------------------------------------------------------------------------------------------------------------------------------------------------------|-------------------------------|
| 1  | Consent or assent             | 26a | Who will obtain informed consent or assent from potential trial participants or authorised surrogates, and how (see Item 32)                                                                                                                                                        | __17__                        |
| 2  |                               |     |                                                                                                                                                                                                                                                                                     |                               |
| 3  |                               |     |                                                                                                                                                                                                                                                                                     |                               |
| 4  |                               | 26b | Additional consent provisions for collection and use of participant data and biological specimens in ancillary studies, if applicable                                                                                                                                               | __17__                        |
| 5  |                               |     |                                                                                                                                                                                                                                                                                     |                               |
| 6  |                               |     |                                                                                                                                                                                                                                                                                     |                               |
| 7  | Confidentiality               | 27  | How personal information about potential and enrolled participants will be collected, shared, and maintained in order to protect confidentiality before, during, and after the trial                                                                                                | _____                         |
| 8  |                               |     |                                                                                                                                                                                                                                                                                     |                               |
| 9  |                               |     |                                                                                                                                                                                                                                                                                     |                               |
| 10 | Declaration of interests      | 28  | Financial and other competing interests for principal investigators for the overall trial and each study site                                                                                                                                                                       | _____                         |
| 11 |                               |     |                                                                                                                                                                                                                                                                                     |                               |
| 12 |                               |     |                                                                                                                                                                                                                                                                                     |                               |
| 13 | Access to data                | 29  | Statement of who will have access to the final trial dataset, and disclosure of contractual agreements that limit such access for investigators                                                                                                                                     | _____                         |
| 14 |                               |     |                                                                                                                                                                                                                                                                                     |                               |
| 15 |                               |     |                                                                                                                                                                                                                                                                                     |                               |
| 16 |                               |     |                                                                                                                                                                                                                                                                                     |                               |
| 17 | Ancillary and post-trial care | 30  | Provisions, if any, for ancillary and post-trial care, and for compensation to those who suffer harm from trial participation                                                                                                                                                       | _____                         |
| 18 |                               |     |                                                                                                                                                                                                                                                                                     |                               |
| 19 |                               |     |                                                                                                                                                                                                                                                                                     |                               |
| 20 | Dissemination policy          | 31a | Plans for investigators and sponsor to communicate trial results to participants, healthcare professionals, the public, and other relevant groups (eg, via publication, reporting in results databases, or other data sharing arrangements), including any publication restrictions | __18__                        |
| 21 |                               |     |                                                                                                                                                                                                                                                                                     |                               |
| 22 |                               |     |                                                                                                                                                                                                                                                                                     |                               |
| 23 |                               |     |                                                                                                                                                                                                                                                                                     |                               |
| 24 |                               |     |                                                                                                                                                                                                                                                                                     |                               |
| 25 |                               |     |                                                                                                                                                                                                                                                                                     |                               |
| 26 |                               | 31b | Authorship eligibility guidelines and any intended use of professional writers                                                                                                                                                                                                      | __18__                        |
| 27 |                               |     |                                                                                                                                                                                                                                                                                     |                               |
| 28 |                               | 31c | Plans, if any, for granting public access to the full protocol, participant-level dataset, and statistical code                                                                                                                                                                     | __NA__                        |
| 29 |                               |     |                                                                                                                                                                                                                                                                                     |                               |
| 30 | <b>Appendices</b>             |     |                                                                                                                                                                                                                                                                                     |                               |
| 31 |                               |     |                                                                                                                                                                                                                                                                                     |                               |
| 32 | Informed consent materials    | 32  | Model consent form and other related documentation given to participants and authorised surrogates                                                                                                                                                                                  | _Supplementary materials_____ |
| 33 |                               |     |                                                                                                                                                                                                                                                                                     |                               |
| 34 |                               |     |                                                                                                                                                                                                                                                                                     |                               |
| 35 |                               |     |                                                                                                                                                                                                                                                                                     |                               |
| 36 |                               |     |                                                                                                                                                                                                                                                                                     |                               |
| 37 | Biological specimens          | 33  | Plans for collection, laboratory evaluation, and storage of biological specimens for genetic or molecular analysis in the current trial and for future use in ancillary studies, if applicable                                                                                      | __14__                        |
| 38 |                               |     |                                                                                                                                                                                                                                                                                     |                               |
| 39 |                               |     |                                                                                                                                                                                                                                                                                     |                               |

1 \*It is strongly recommended that this checklist be read in conjunction with the SPIRIT 2013 Explanation & Elaboration for important clarification on the items.  
2 Amendments to the protocol should be tracked and dated. The SPIRIT checklist is copyrighted by the SPIRIT Group under the Creative Commons  
3 [“Attribution-NonCommercial-NoDerivs 3.0 Unported”](#) license.  
4  
5  
6  
7  
8  
9  
10  
11  
12  
13  
14  
15  
16  
17  
18  
19  
20  
21  
22  
23  
24  
25  
26  
27  
28  
29  
30  
31  
32  
33  
34  
35  
36  
37  
38  
39  
40  
41  
42  
43  
44  
45  
46  
47

For peer review only
